# Supplementary material for: A trimethyllysine-containing trityl tag for solubilizing hydrophobic peptides
Source: Royal Society of Chemistry journal article supplement (doi:10.1039/c9ob02253h), 2019-01-01

## Supporting Information

### **Trimethyllysine-containing trityl tag for solubilizing hydrophobic peptides**

Shun Masuda, Shugo Tsuda and Taku Yoshiya\*

*Peptide Institute, Inc., Ibaraki, Osaka 567-0085, Japan*

#### Contents

- 1. NMR spectra of Fmoc-Cys(O<sub>3</sub>H)-OH**
- 2. Solubilities of Trt-K<sub>5</sub>/R<sub>5</sub> tag-attached SPP4 in different solvents applied for various ligation techniques**
- 3. Analytical HPLC chromatograms and ESI-MS spectra of peptides**

# 1. NMR spectra of Fmoc-Cys(O<sub>3</sub>H)-OH

*Fmoc-Cys(O<sub>3</sub>H)-OH*

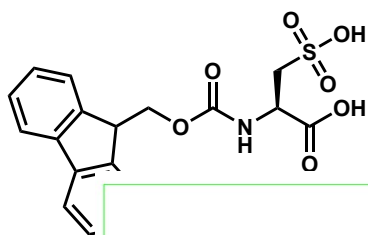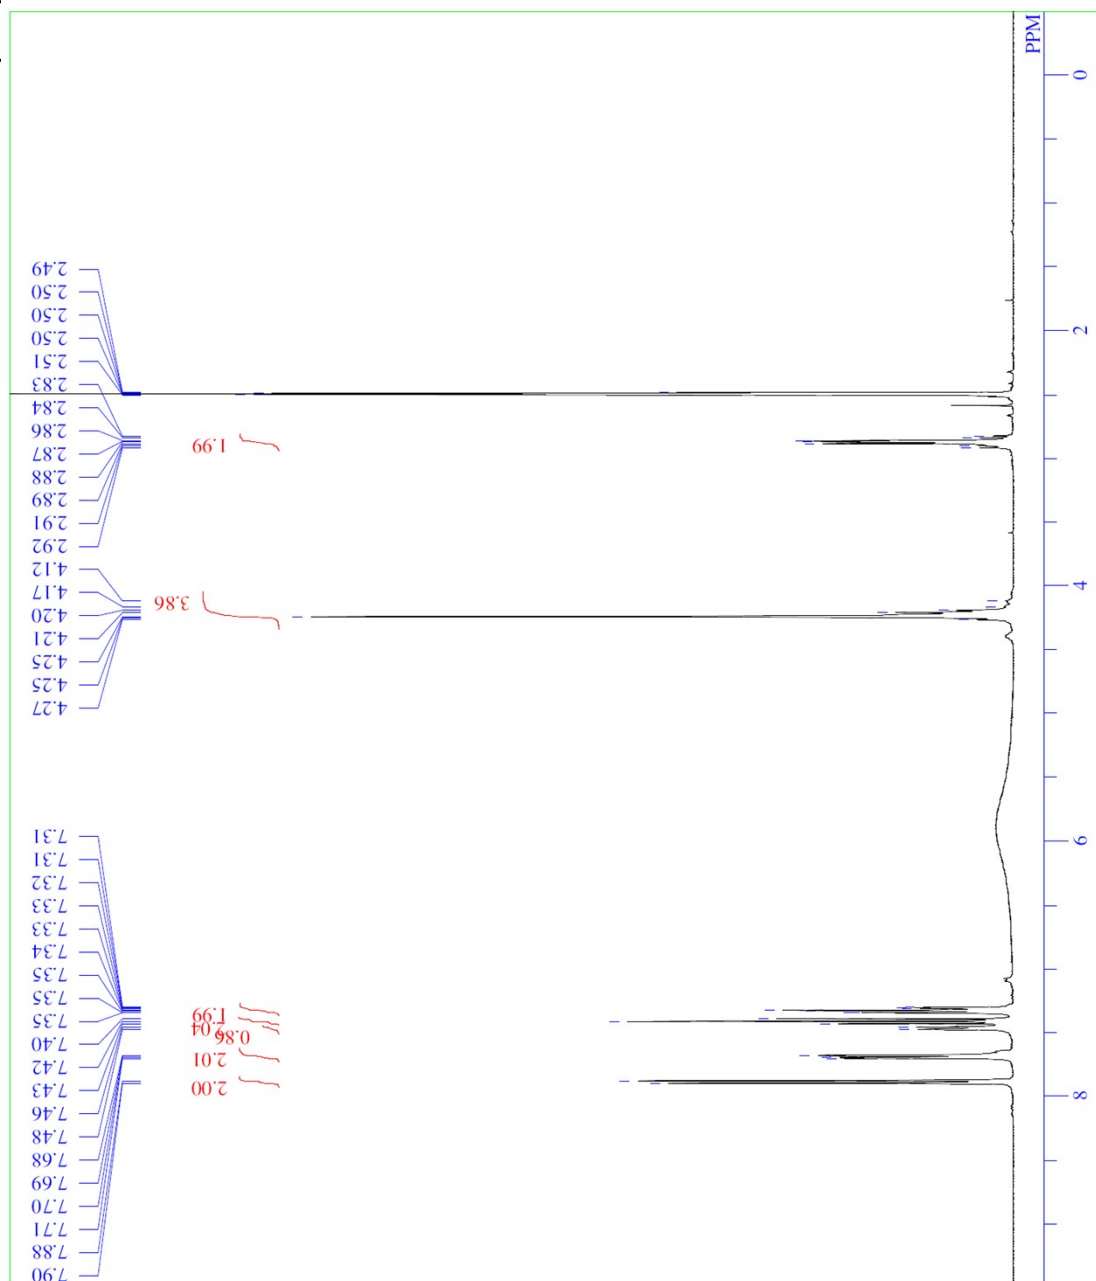

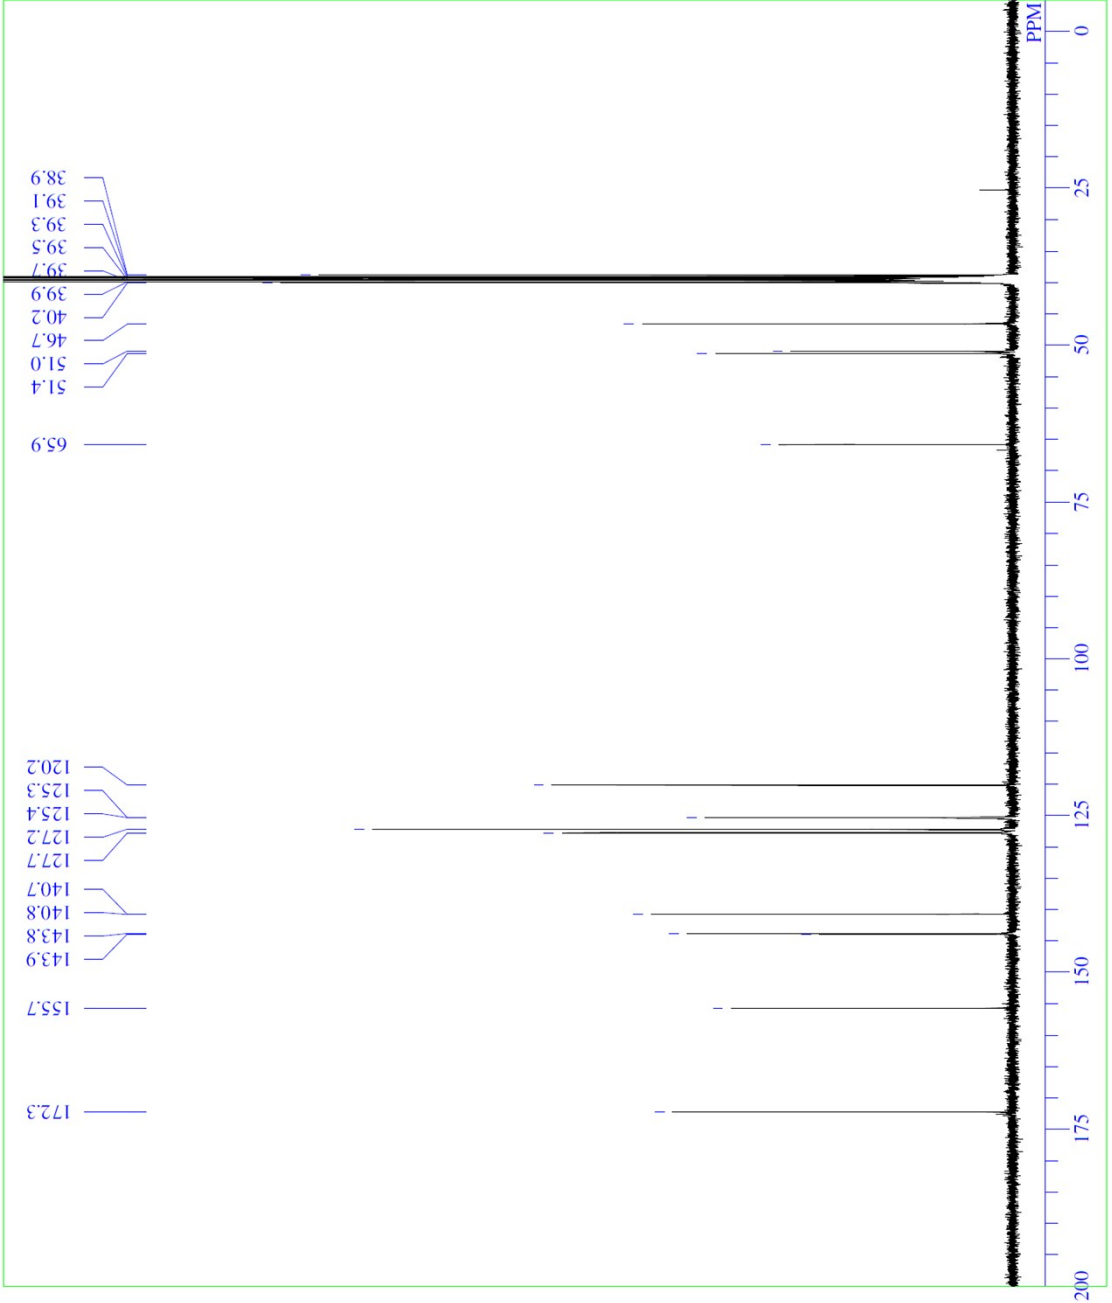

## 2. Solubilities of Trt-K<sub>5</sub>/R<sub>5</sub> tag-attached SPP4 in different solvents applied for various ligation techniques

Table S1. Solubilities of Trt K<sub>5</sub>/R<sub>5</sub> tag-attached SPP4<sup>a</sup>

|                         | Solubility / mM                    |                             |                     |
|-------------------------|------------------------------------|-----------------------------|---------------------|
|                         | 6 M Gn·HCl, 0.2 M phosphate (pH 7) | DMSO:H <sub>2</sub> O (9:1) | Pyridine:AcOH (1:1) |
| SPP4                    | 0.26                               | 4.13                        | 0.02                |
| SPP4-Trt-K <sub>5</sub> | > 5.00                             | > 5.00                      | 0.01                |
| SPP4-Trt-R <sub>5</sub> | > 5.00                             | > 5.00                      | 0.01                |

<sup>a</sup> Solubility was evaluated in a similar method to Fig. 5.

### 3. Analytical HPLC chromatograms and ESI-MS spectra of peptides.

*Ac-VVCVV-NH<sub>2</sub>* (**1**)

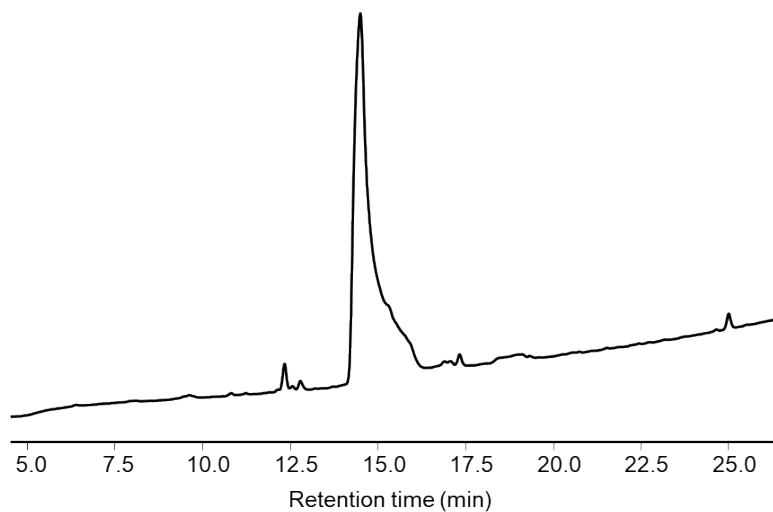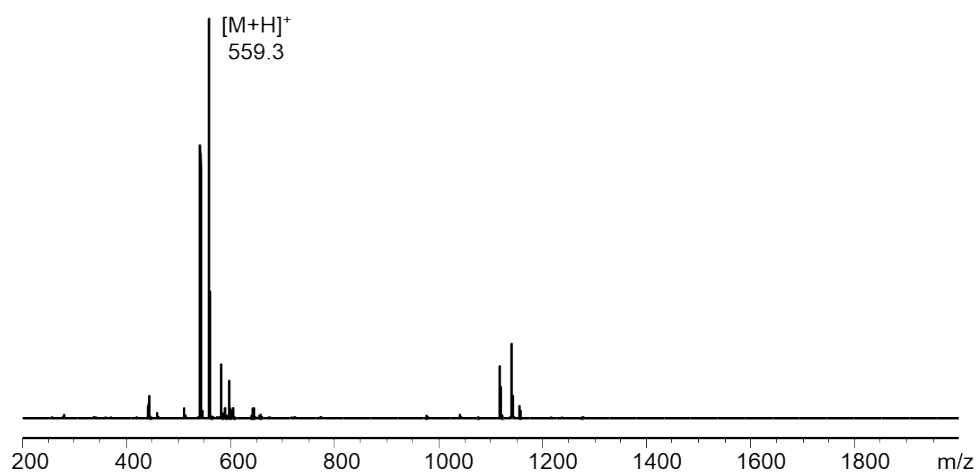

*STGCILLGGLFIYDVFVWVFGTNNMVTVAKS-NH<sub>2</sub> = SPP4 (2)*

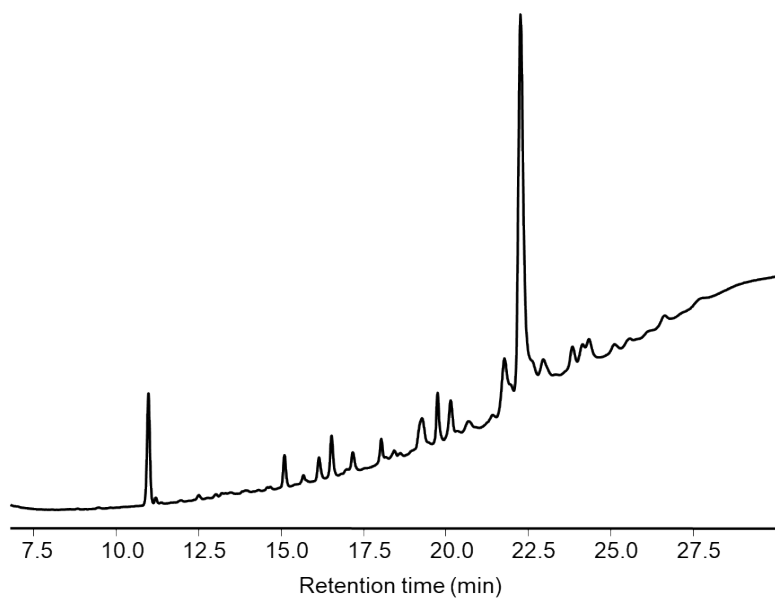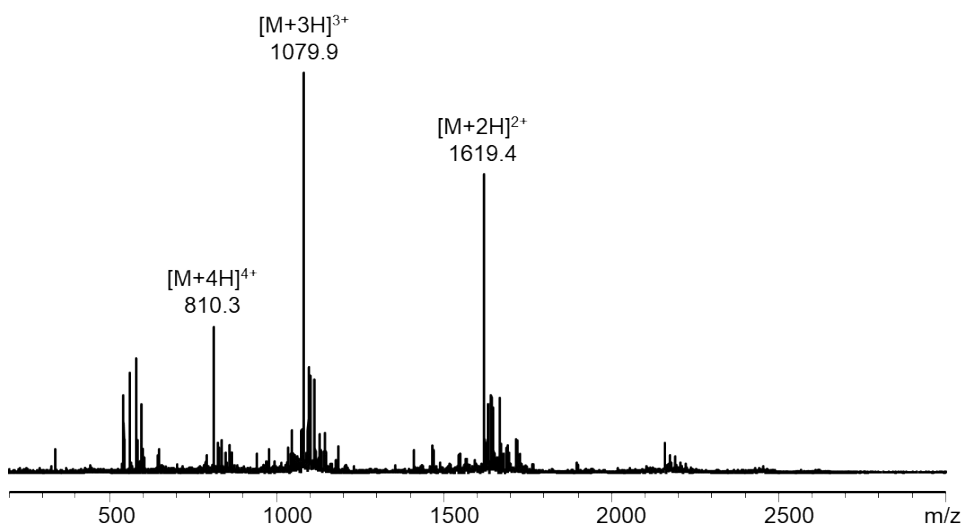

*Trt(OH)-K<sub>10</sub>*

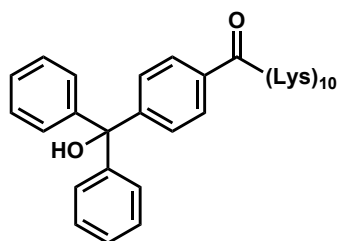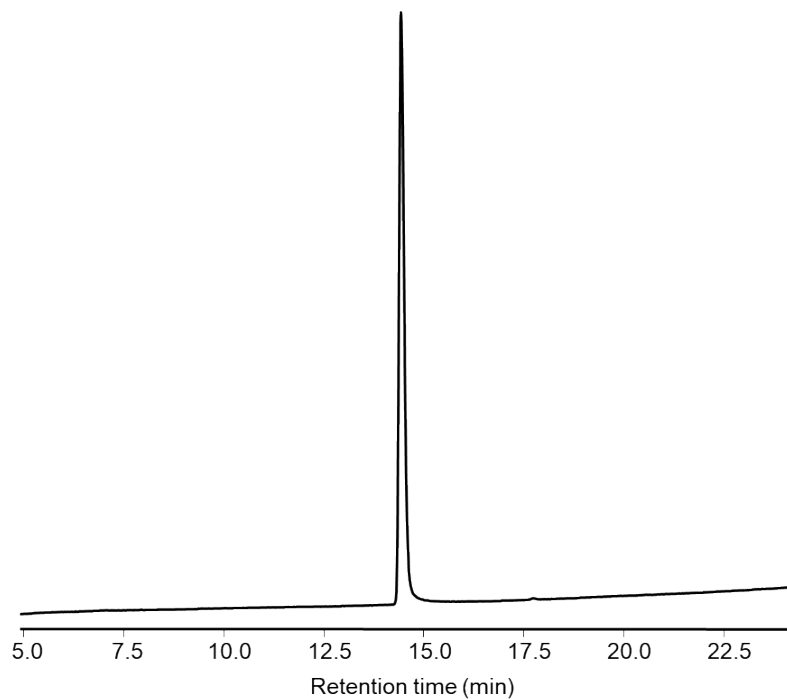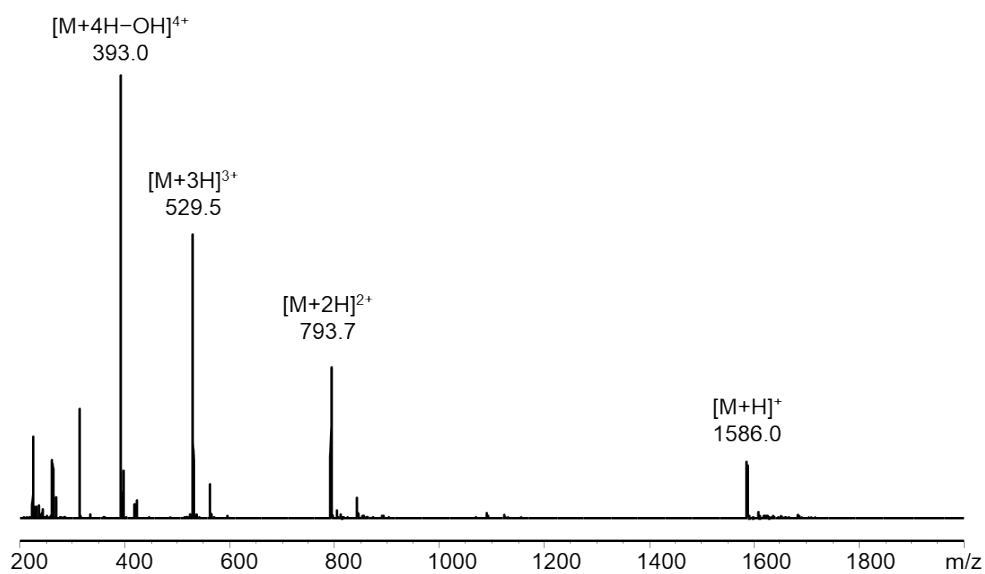

*Trt(OH)-K<sub>8</sub>*

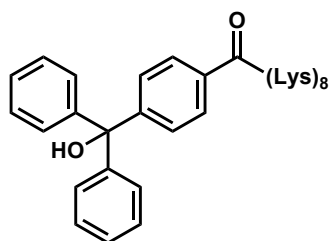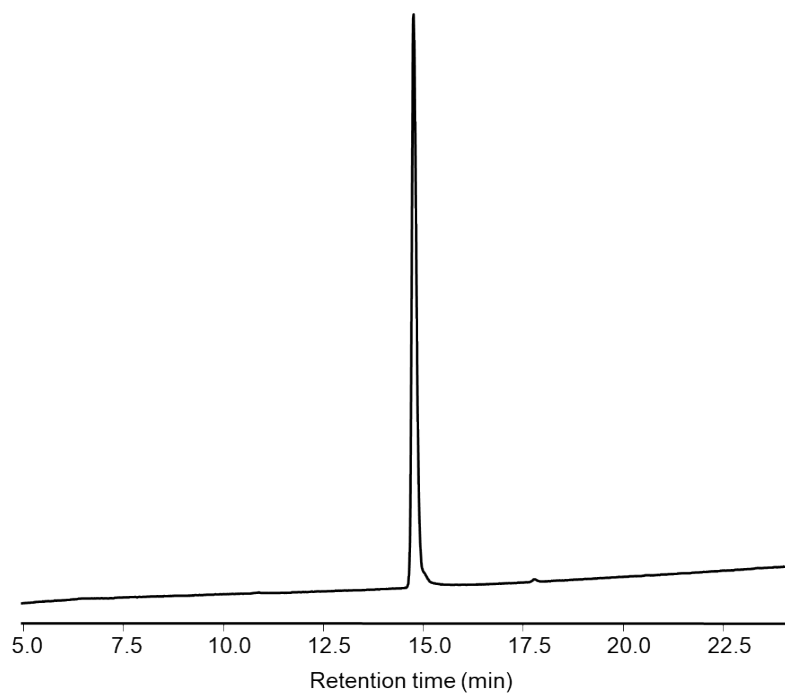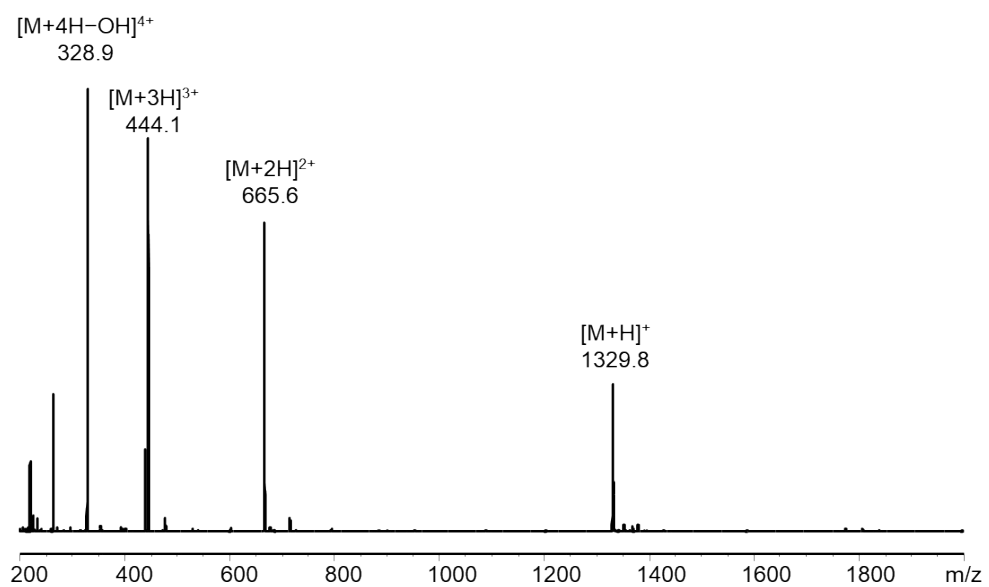



*Trt(OH)-K<sub>5</sub>*

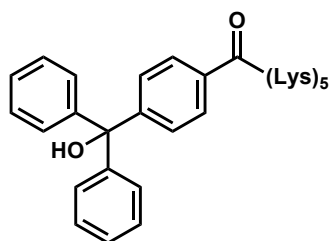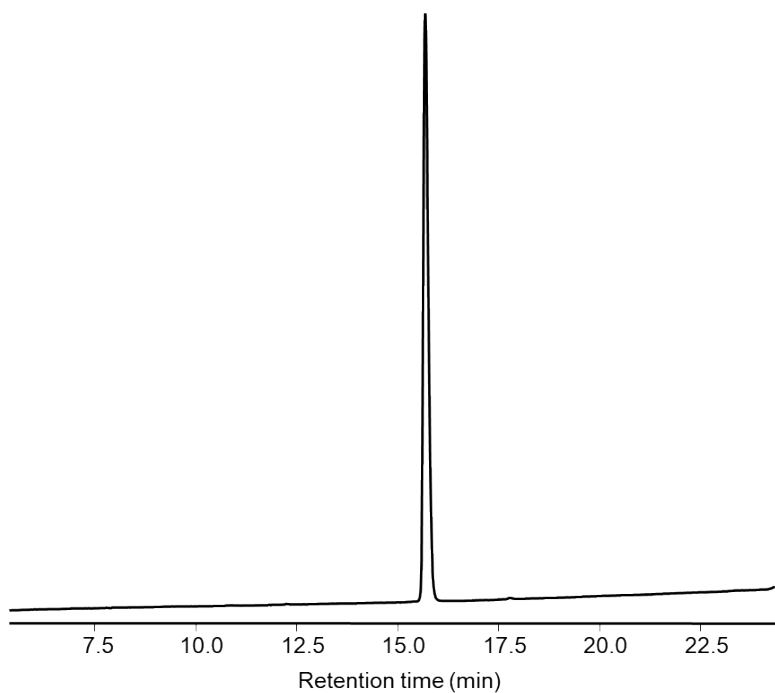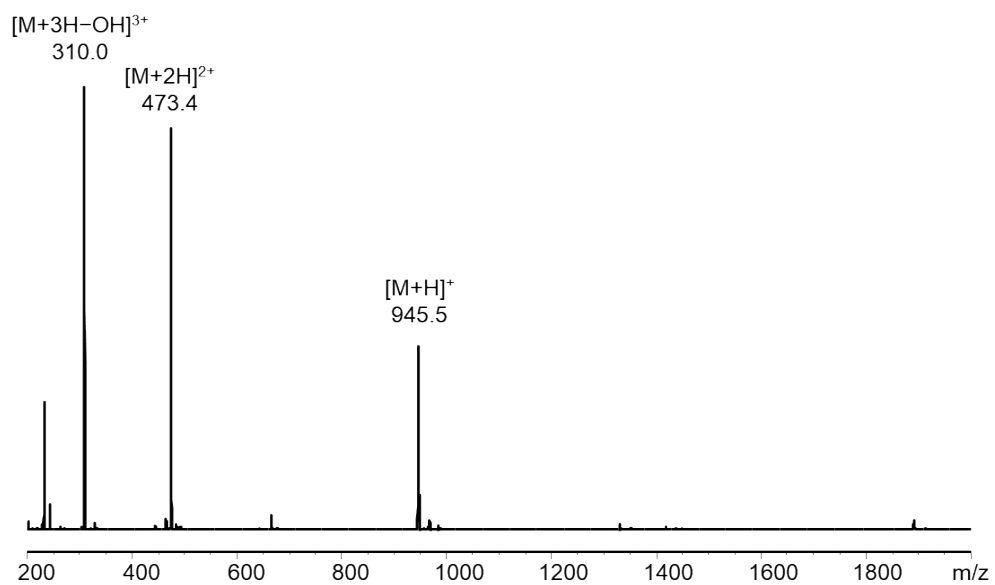

*Trt(OH)-K<sub>4</sub>*

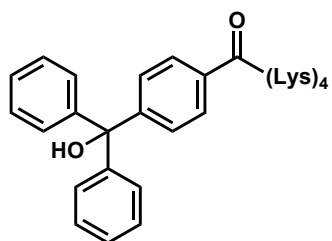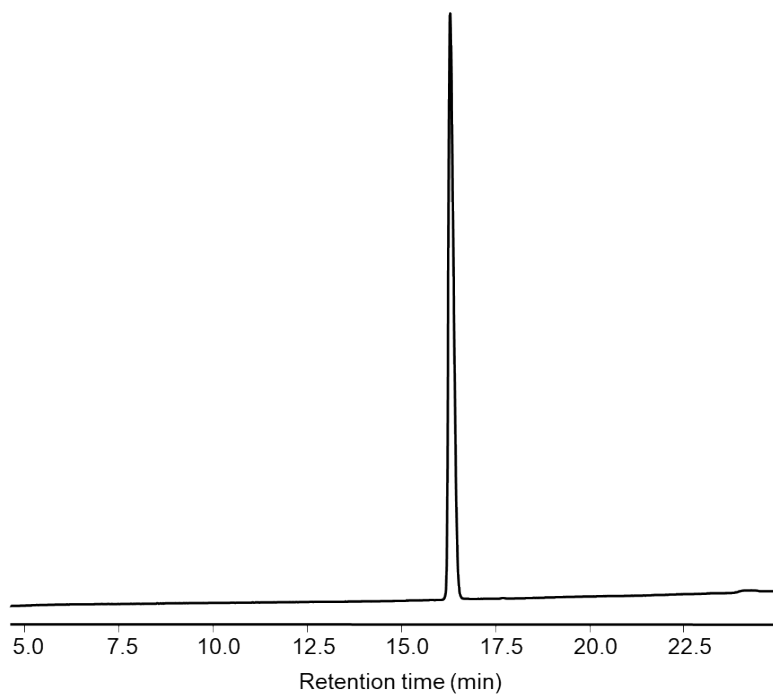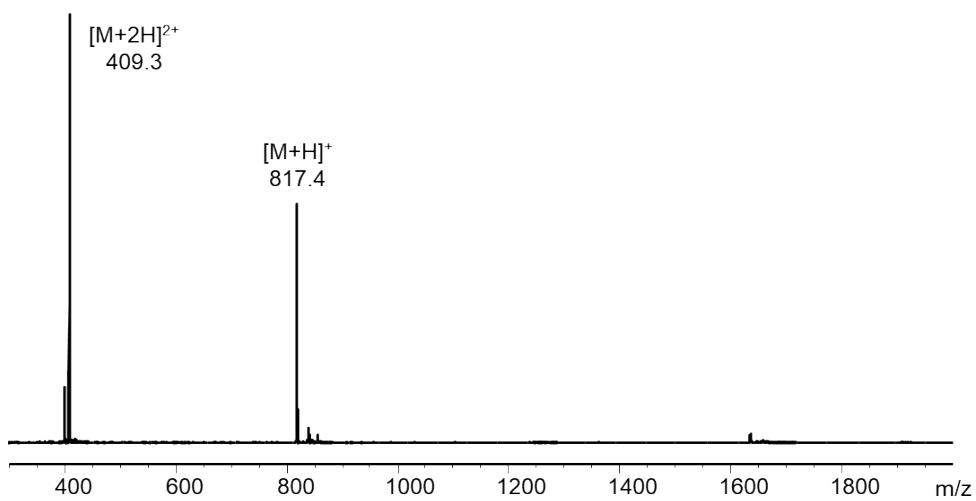

*Trt(OH)-K<sub>3</sub>*

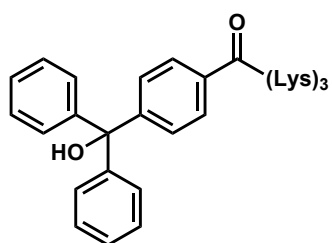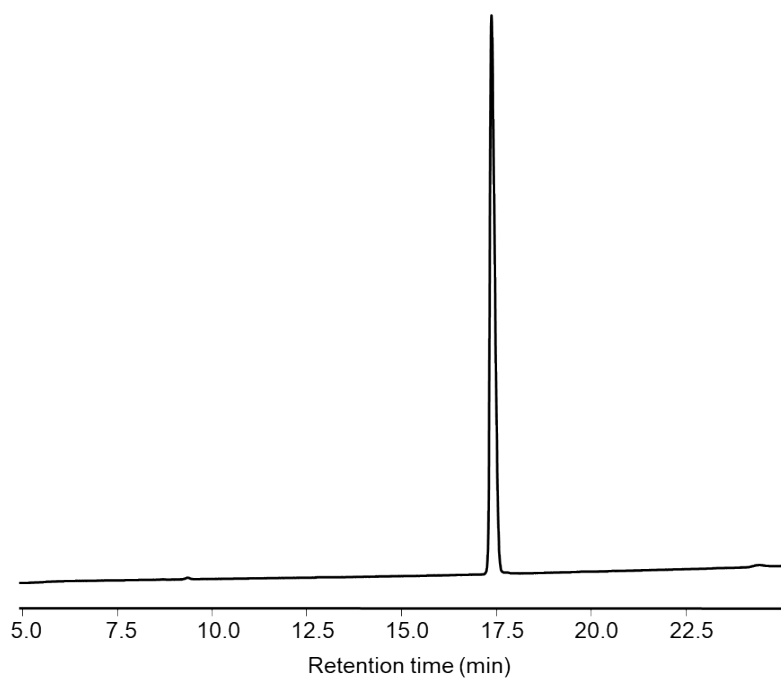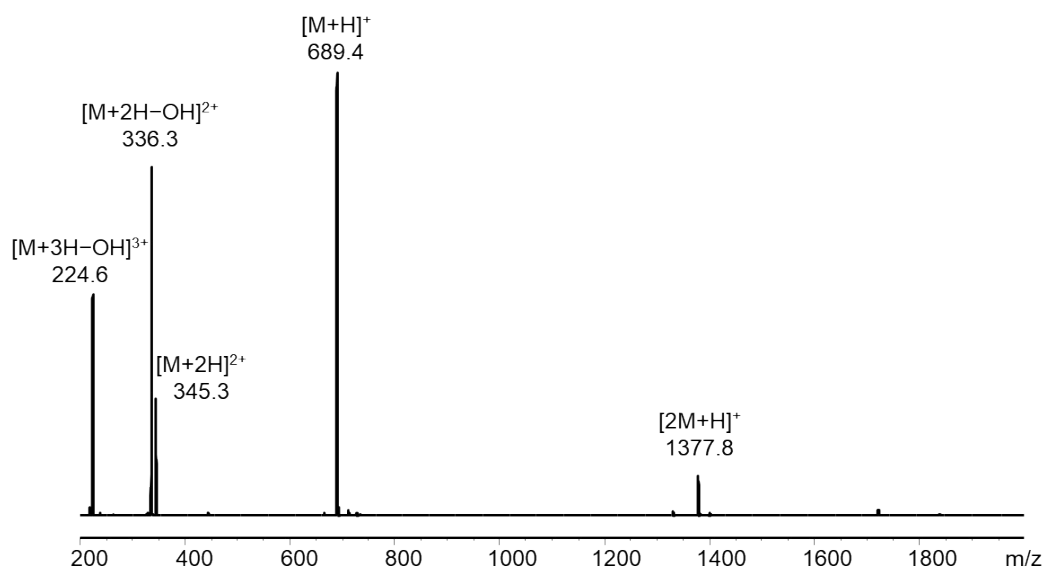

*Trt(OH)-R<sub>8</sub>*

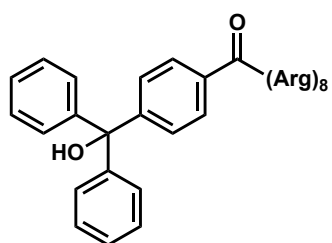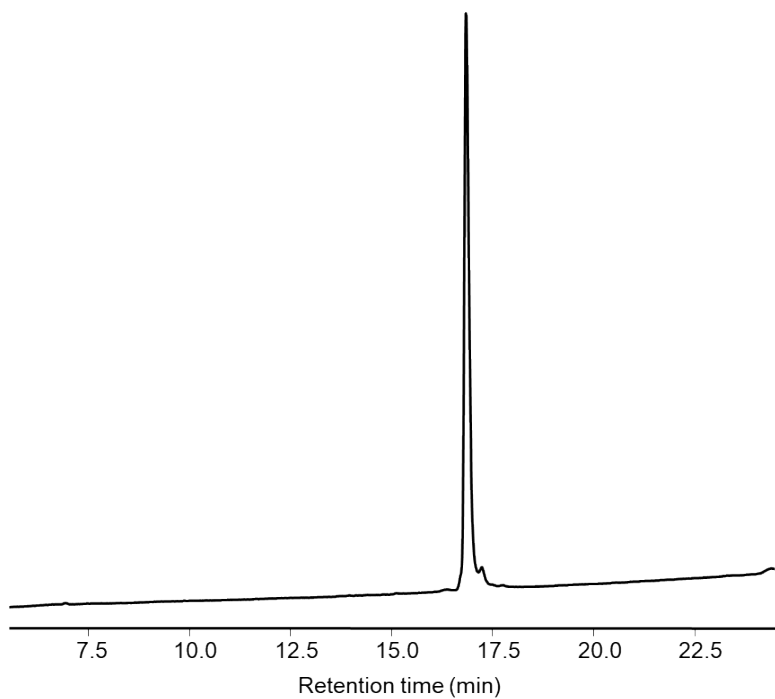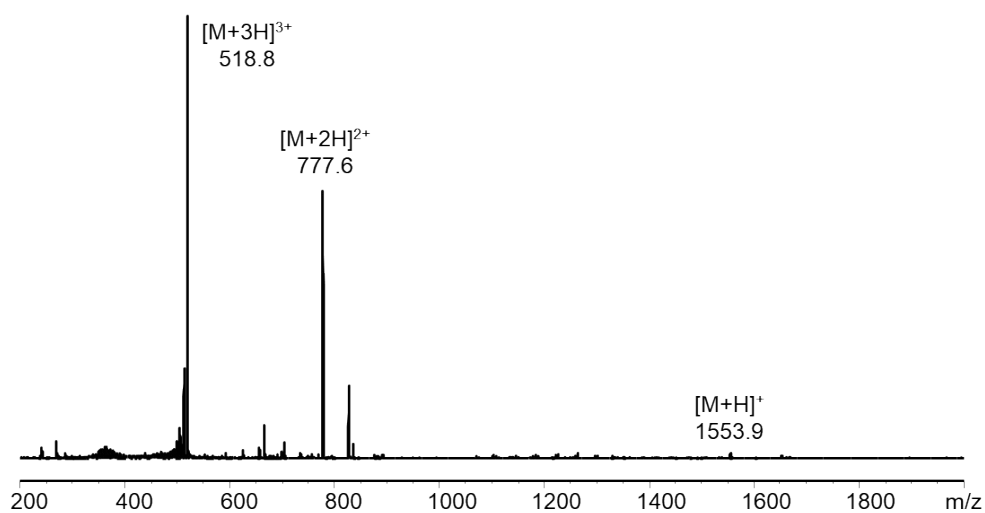

*Trt(OH)-R<sub>5</sub>*

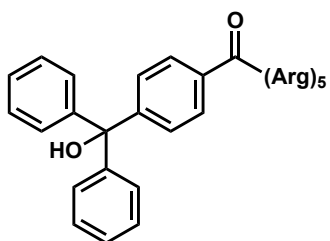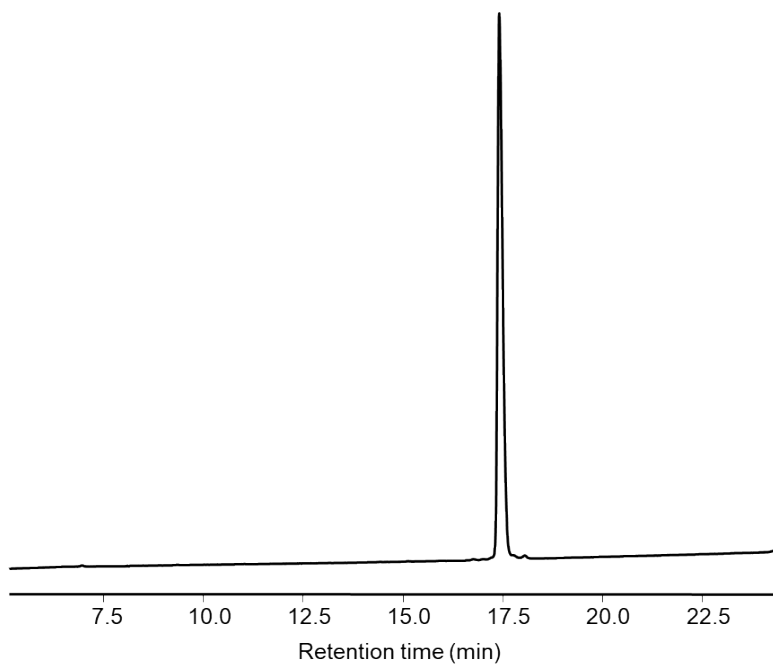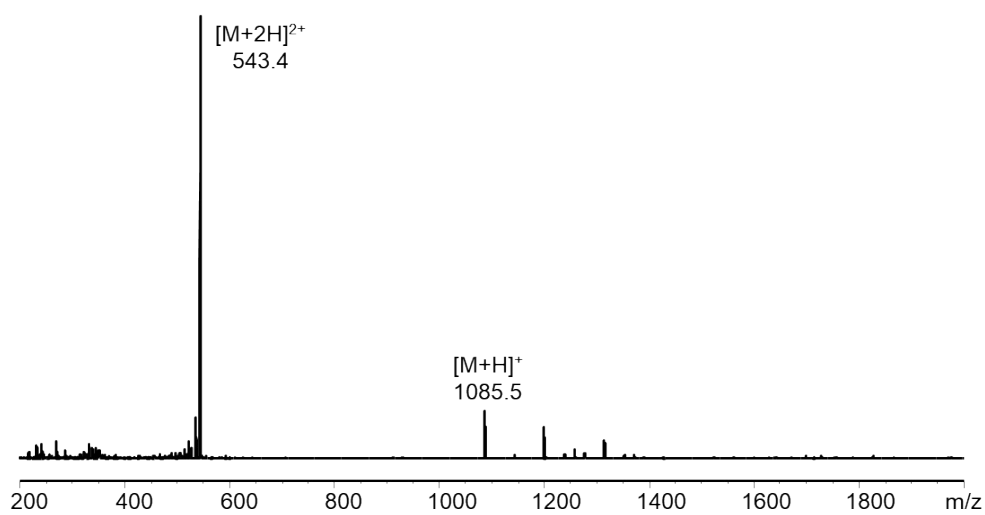

*Trt(OH)-R<sub>3</sub>*

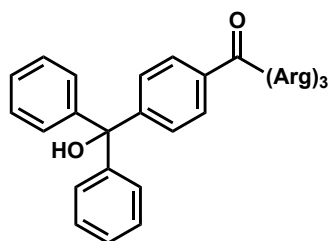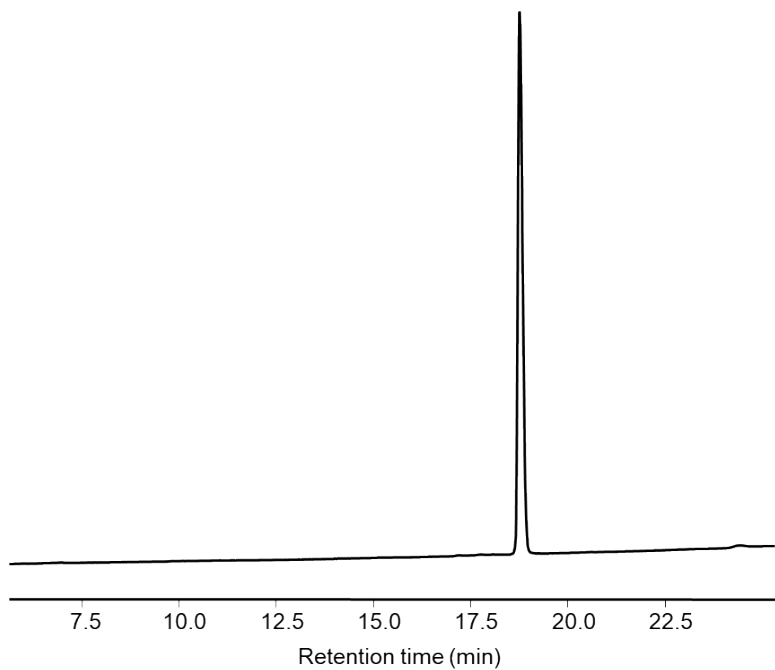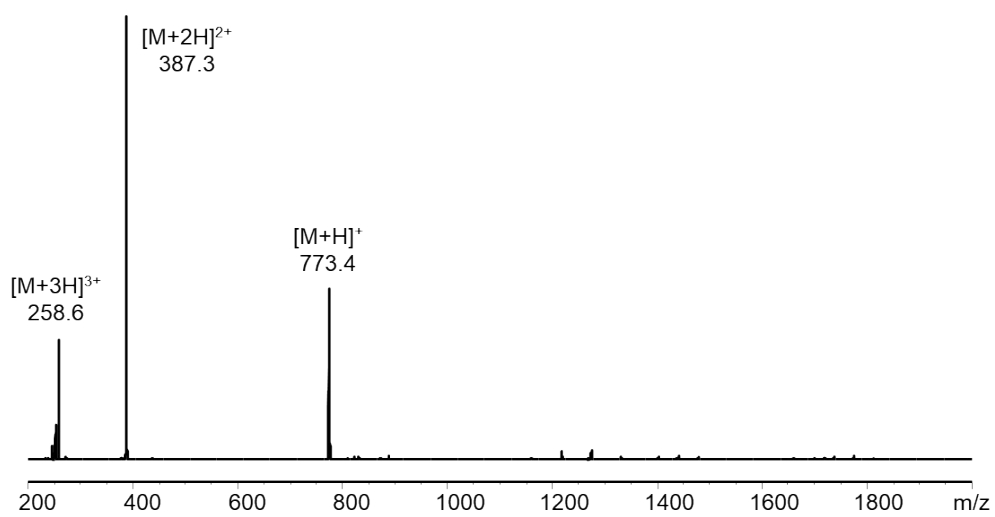

*Trt(OH)-E<sub>5</sub>*

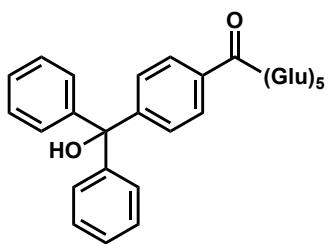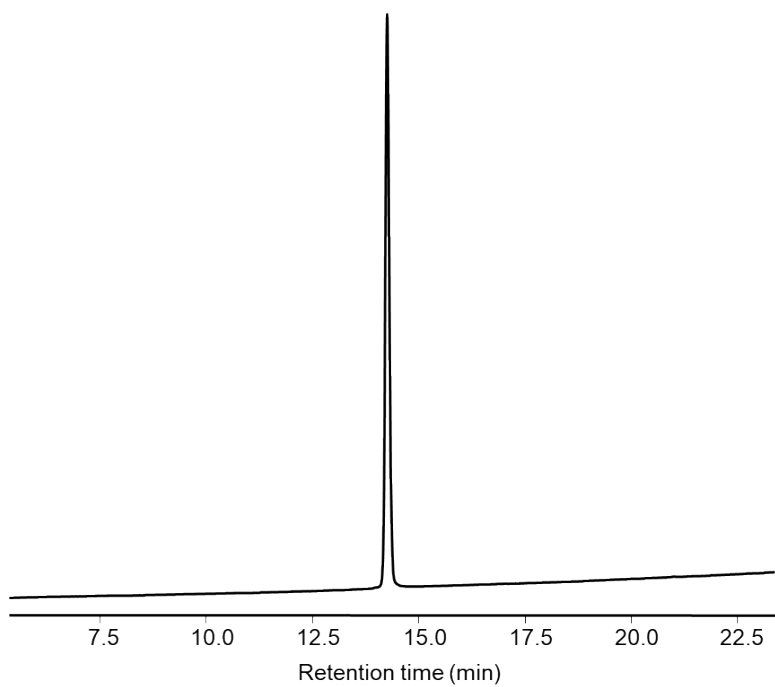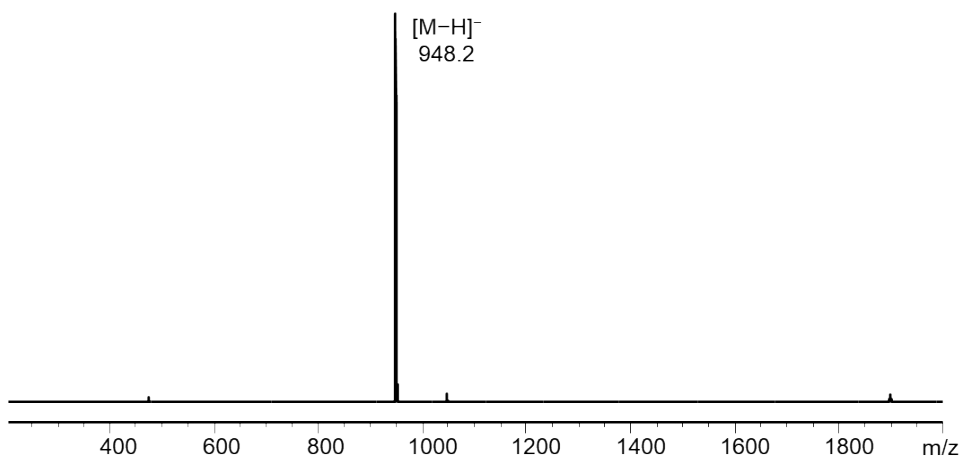

*Trt(OH)-N<sub>5</sub>*

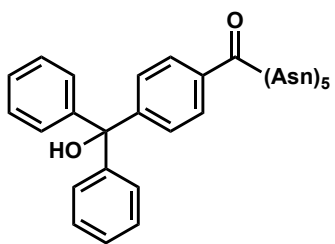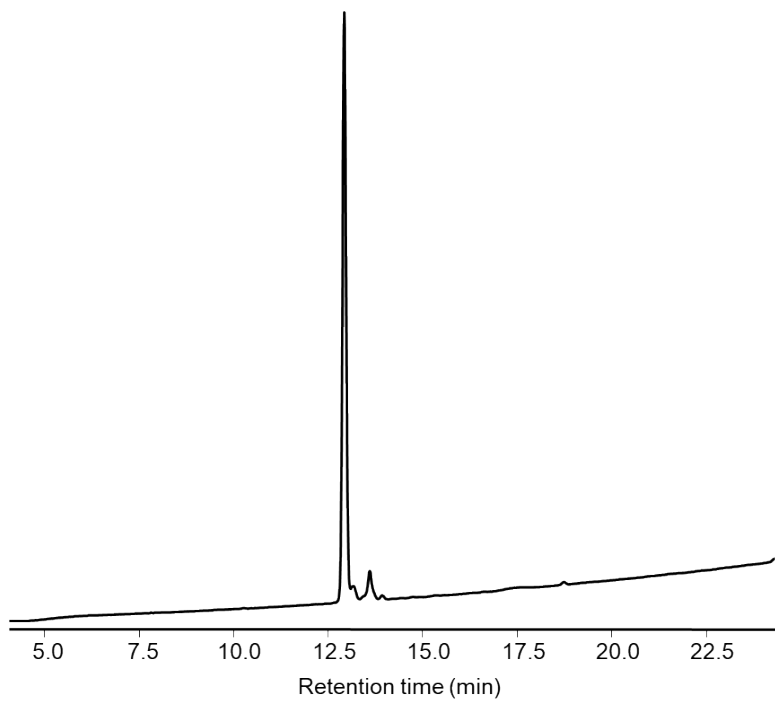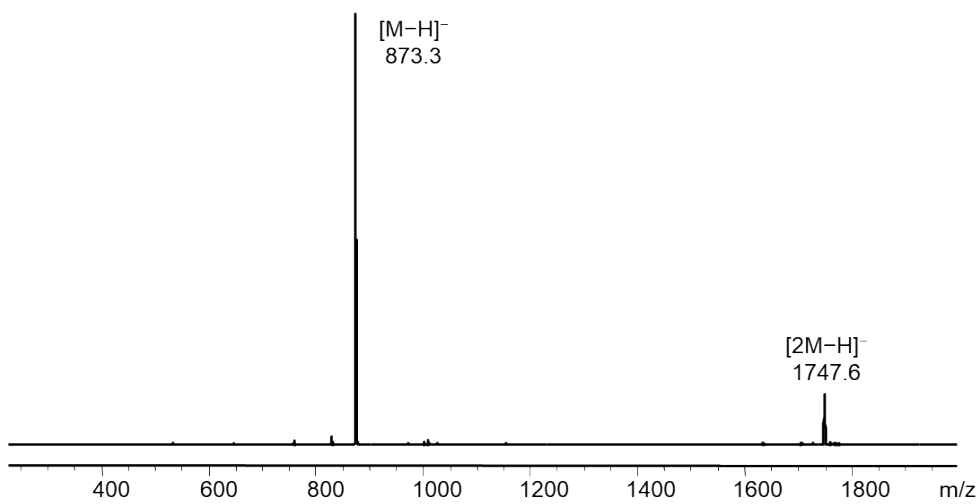





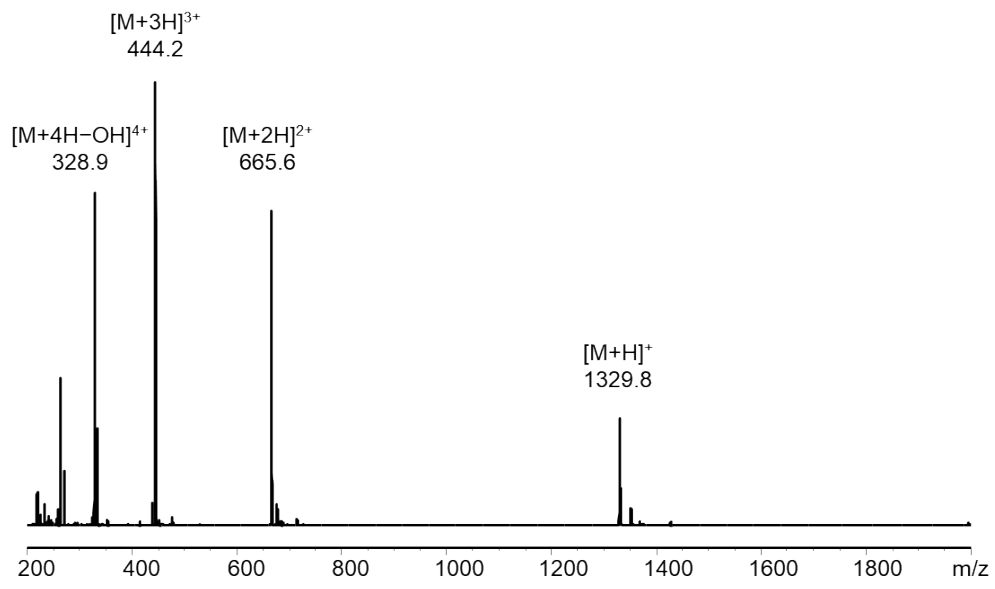

*Trt(OH)-[K(Me<sub>3</sub>)]<sub>5</sub>*

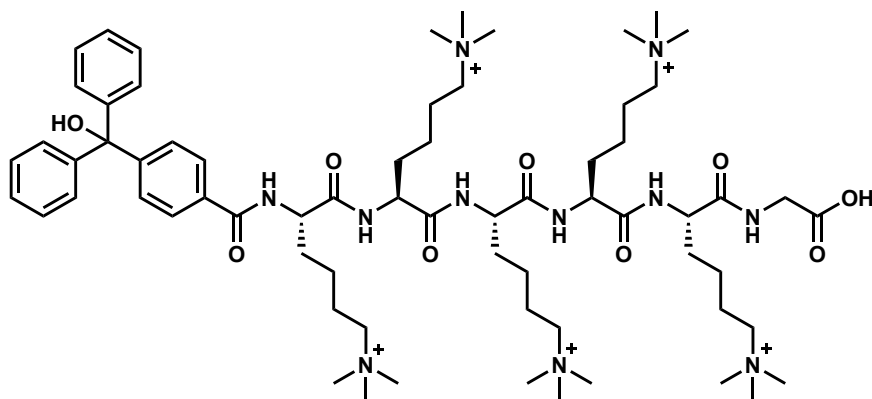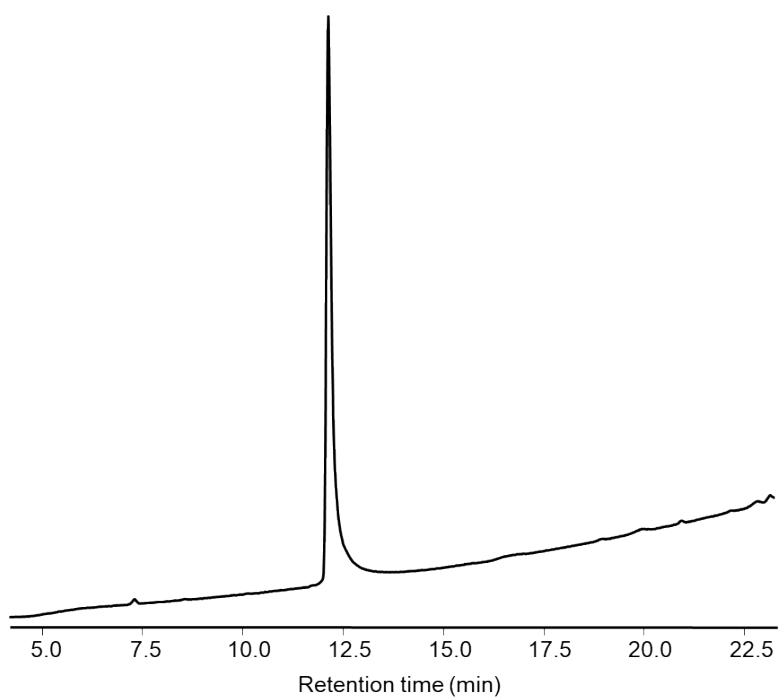

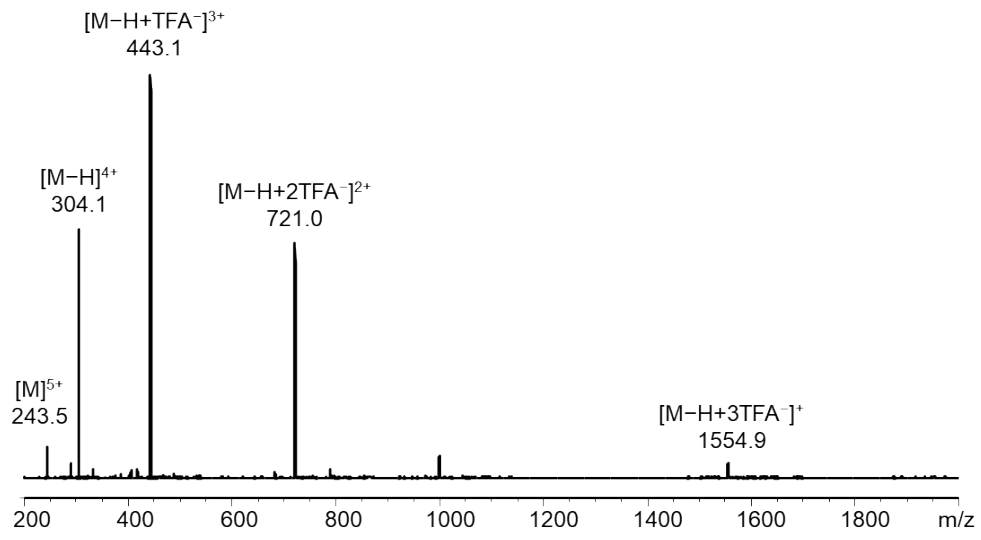

*Trt(OH)-[C(O<sub>3</sub>H)]<sub>5</sub>*

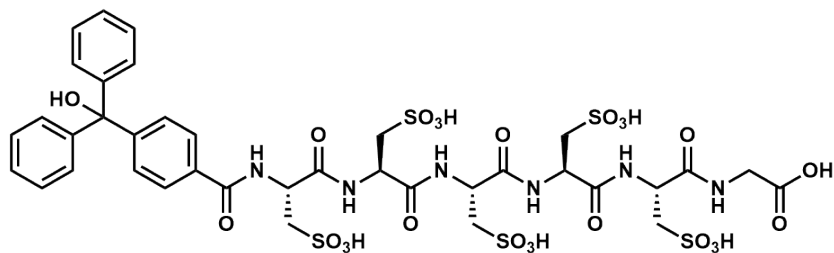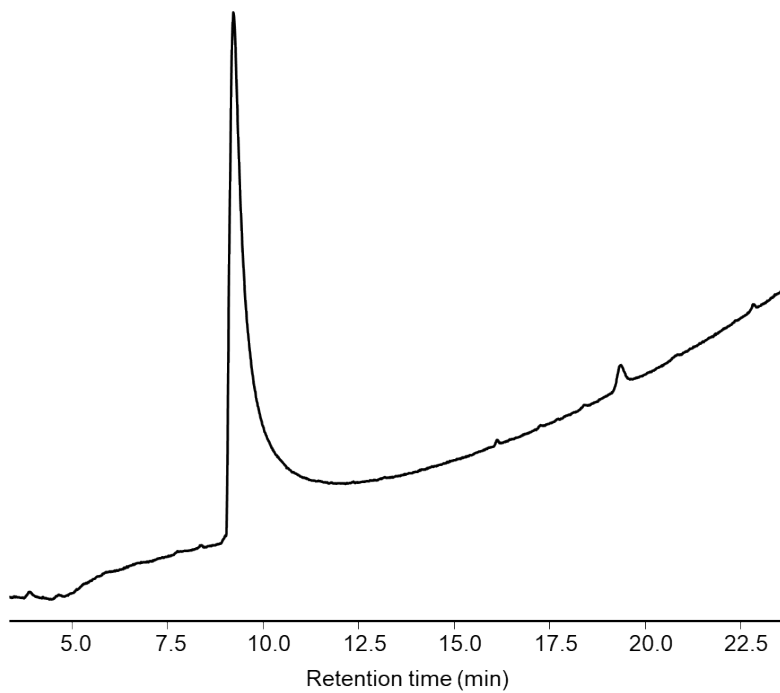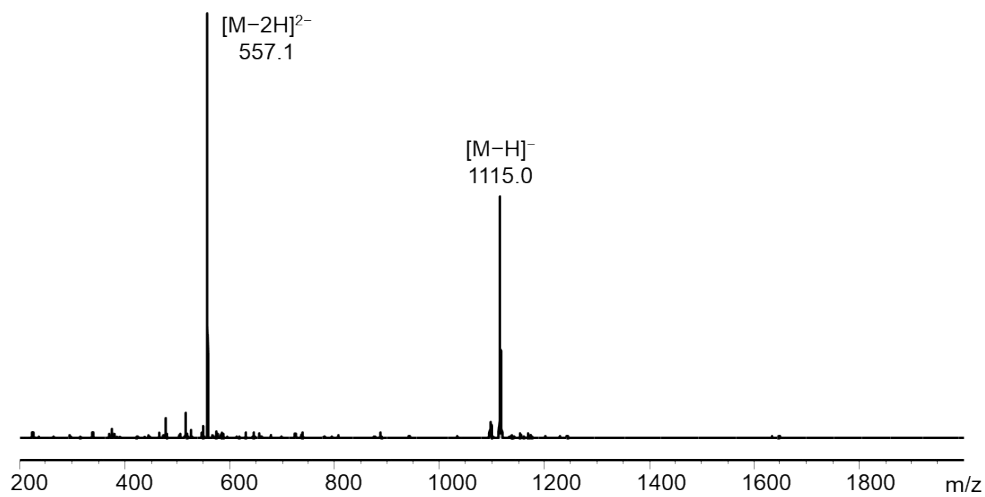

*Ac-VVC(Trt-K<sub>10</sub>)VV-NH<sub>2</sub>*

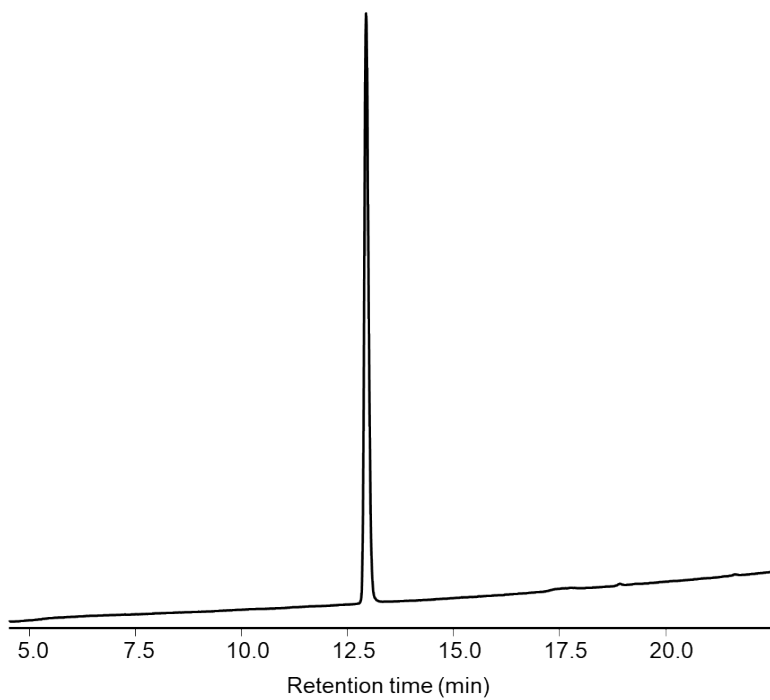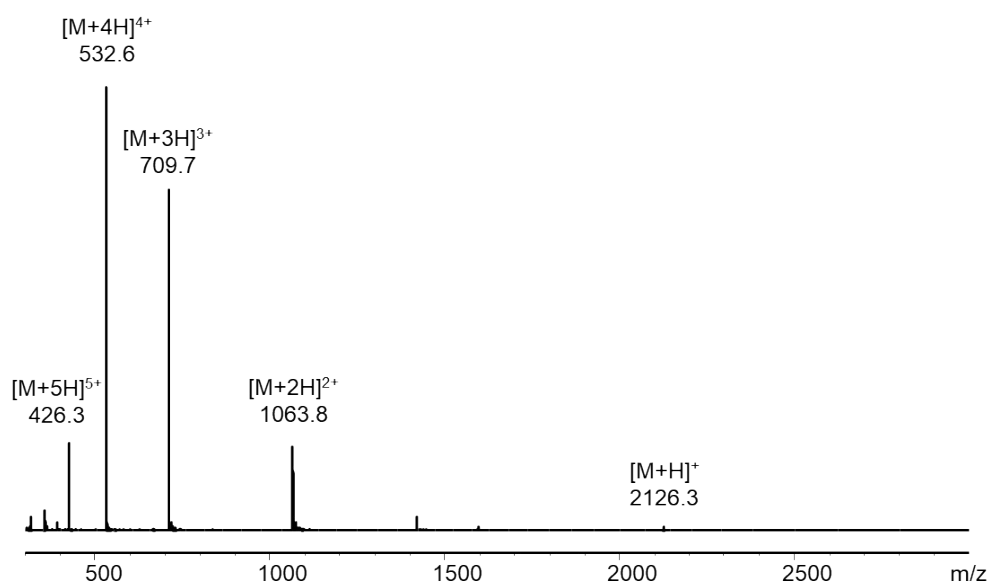

*Ac-VVC(Trt-K<sub>8</sub>)VV-NH<sub>2</sub>*

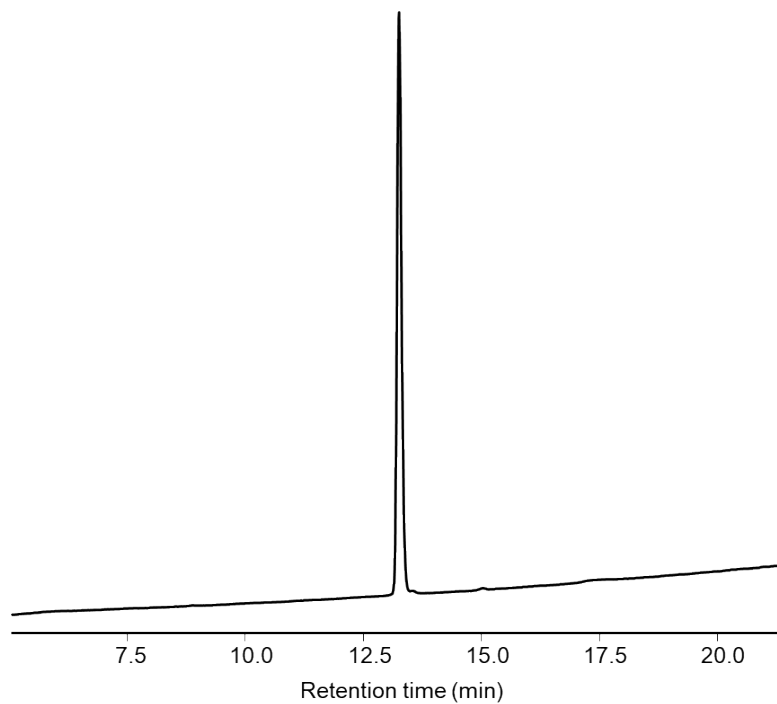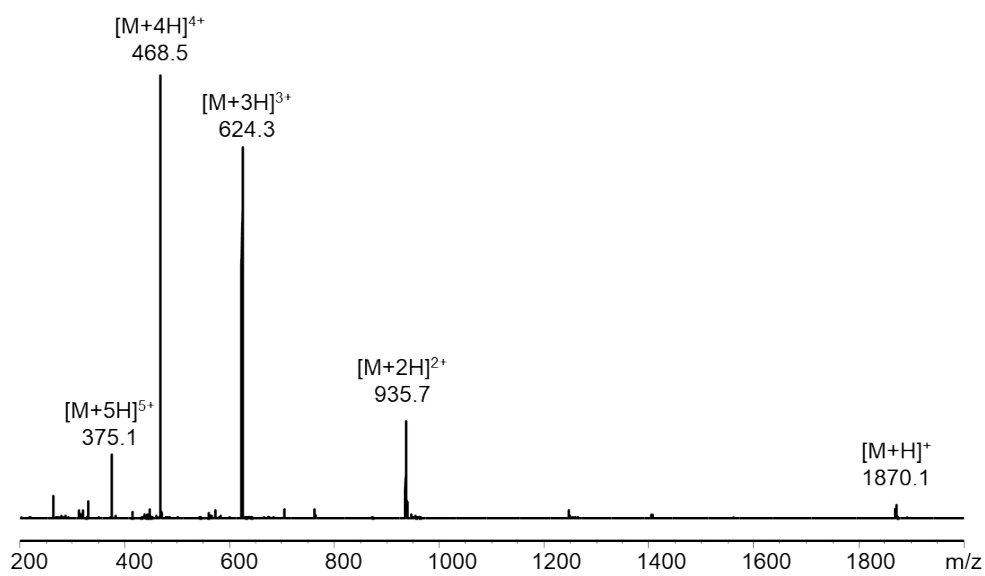

*Ac-VVC(Trt-branched K<sub>8</sub>)VV-NH<sub>2</sub>*

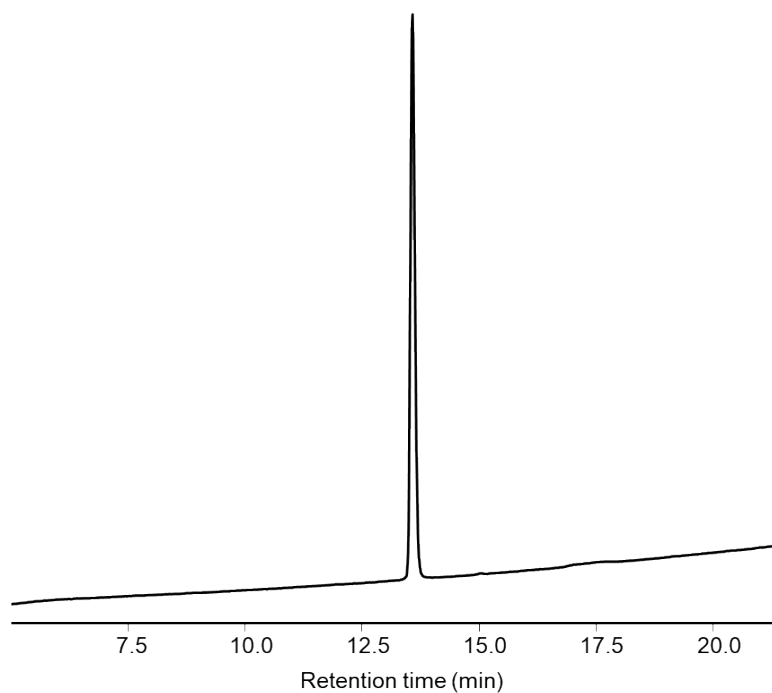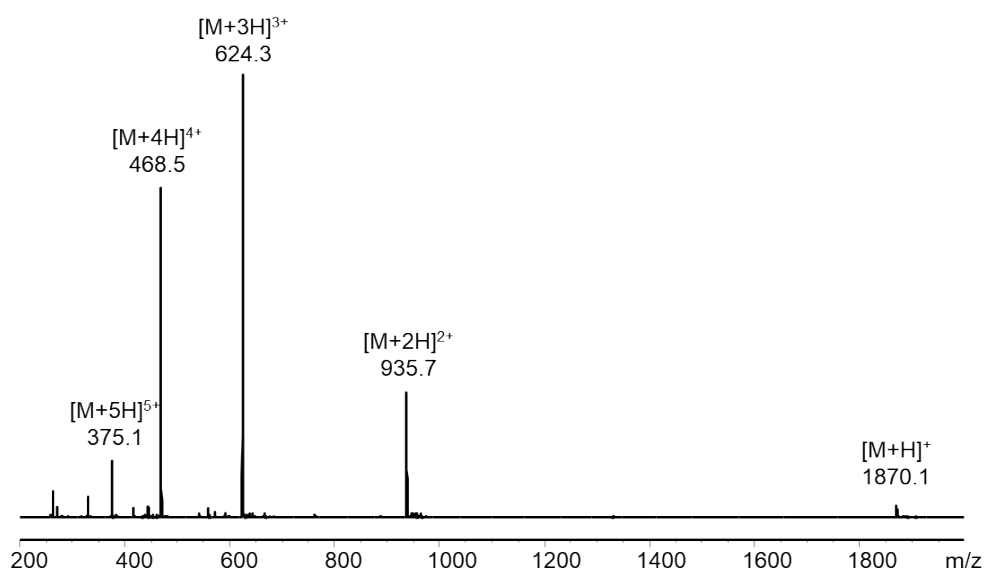



*Ac-VVC(Trt-K<sub>5</sub>)VV-NH<sub>2</sub>*

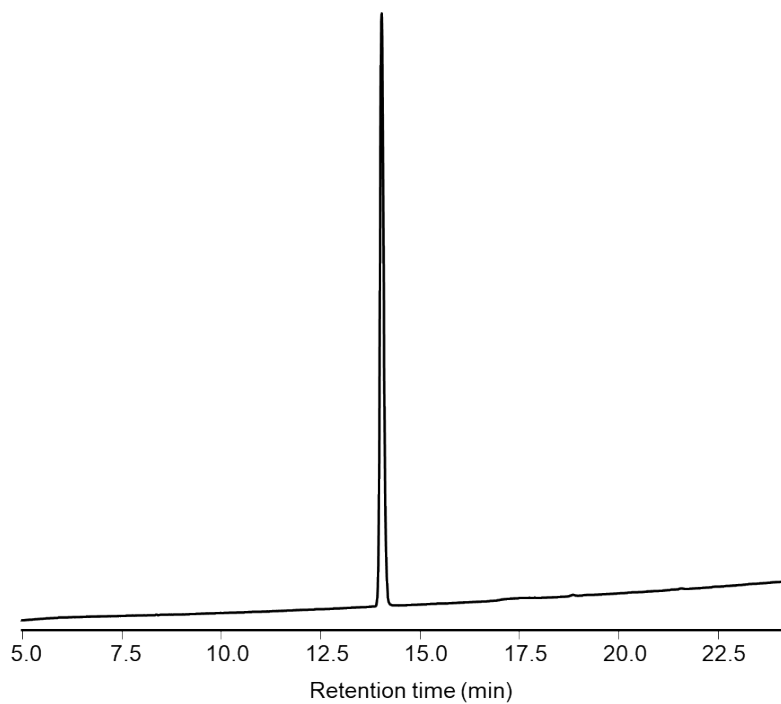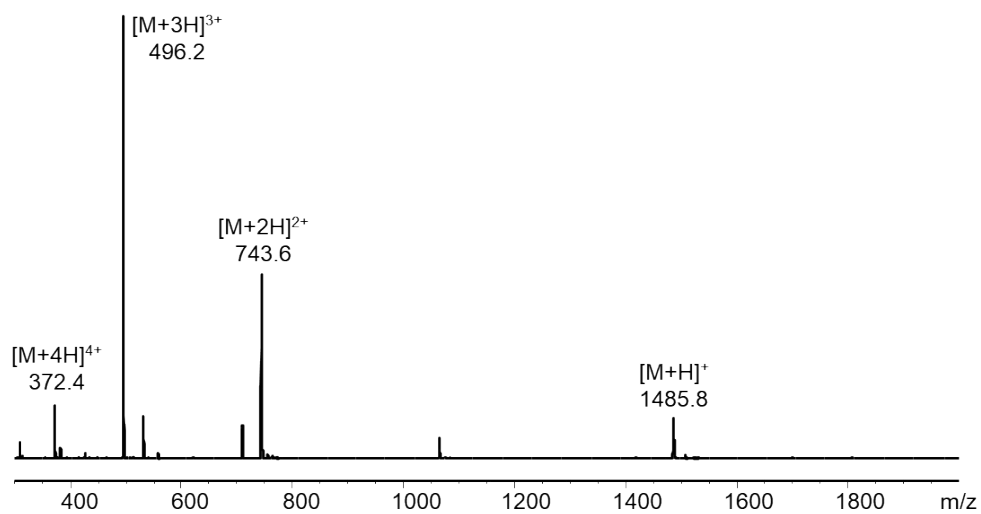

*Ac-VVC(Trt-K<sub>4</sub>)VV-NH<sub>2</sub>*

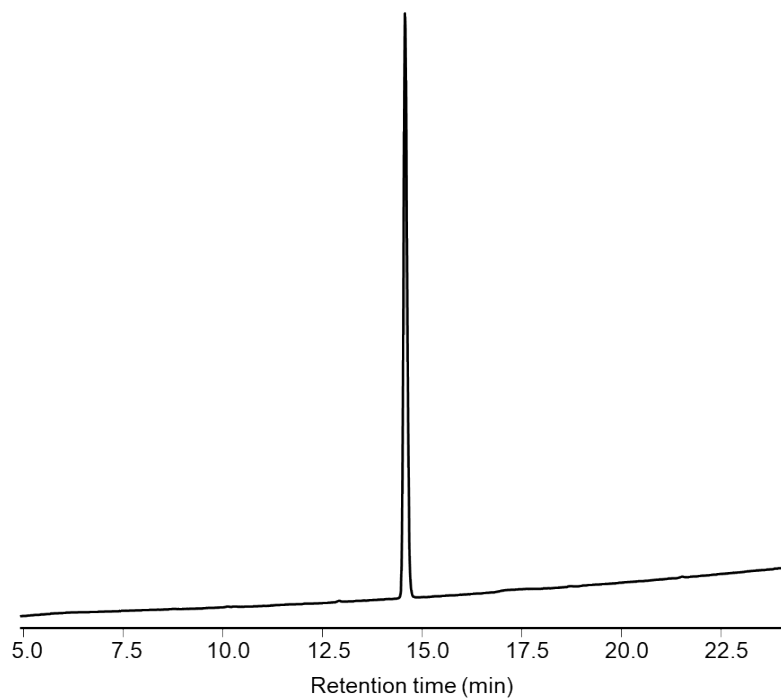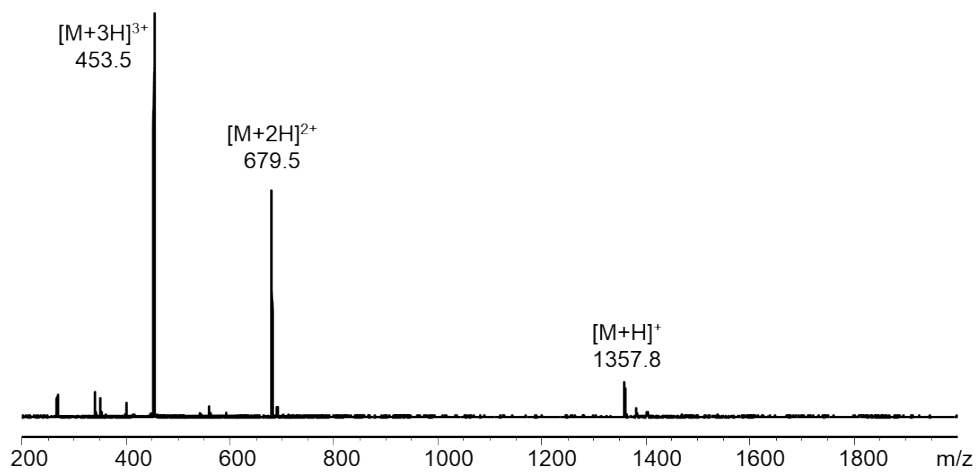

*Ac-VVC(Trt-K<sub>3</sub>)VV-NH<sub>2</sub>*

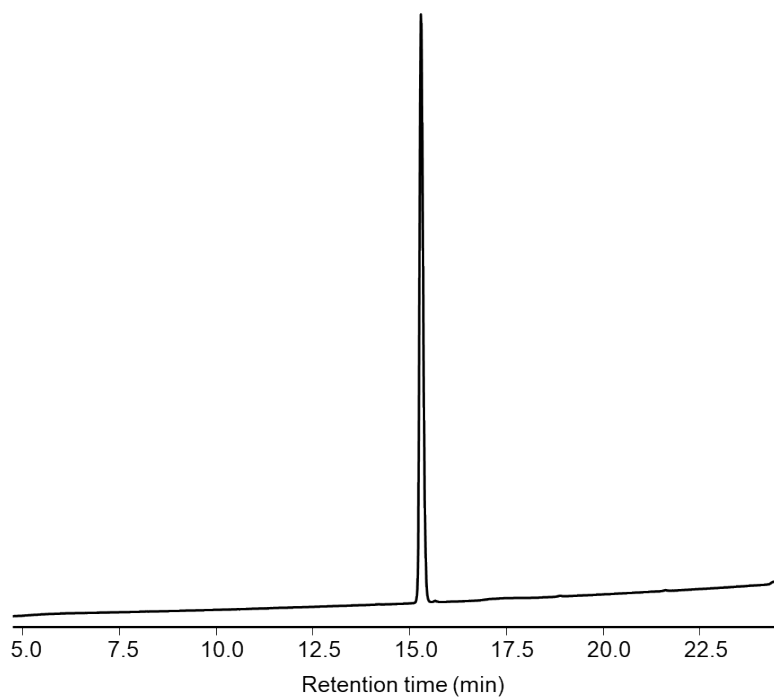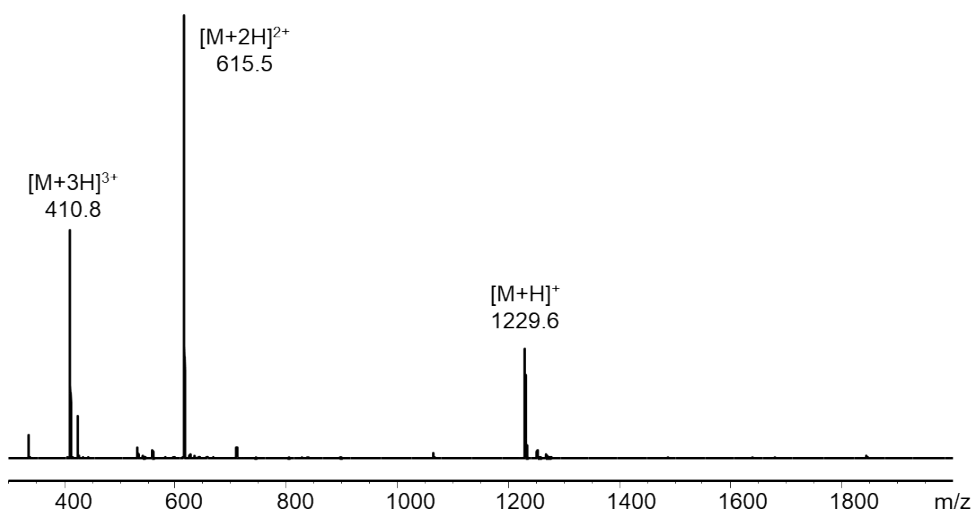

*Ac-VVC(Trt-R<sub>8</sub>)VV-NH<sub>2</sub>*

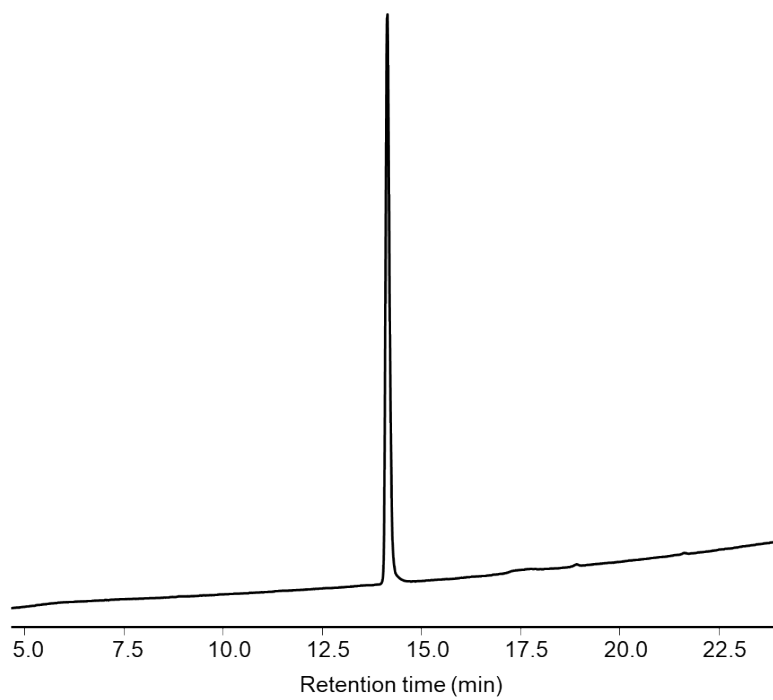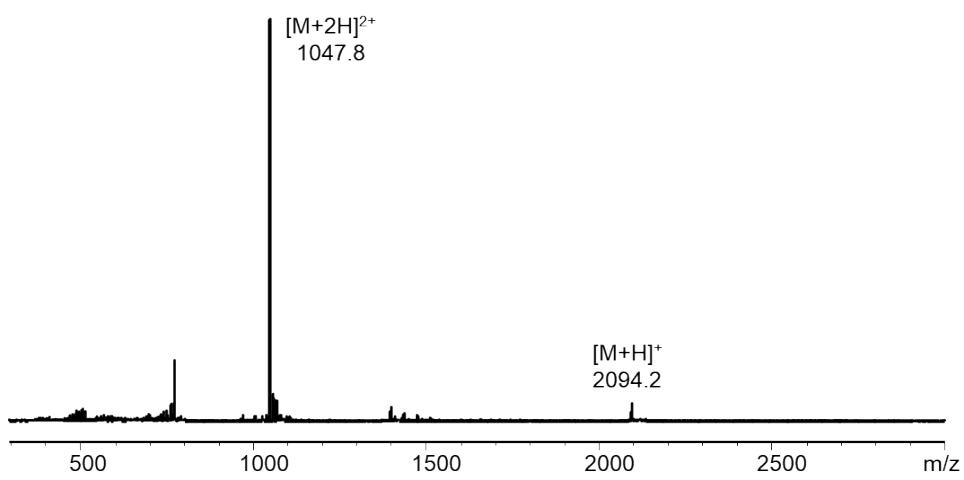

*Ac-VVC(Trt-R<sub>5</sub>)VV-NH<sub>2</sub>*

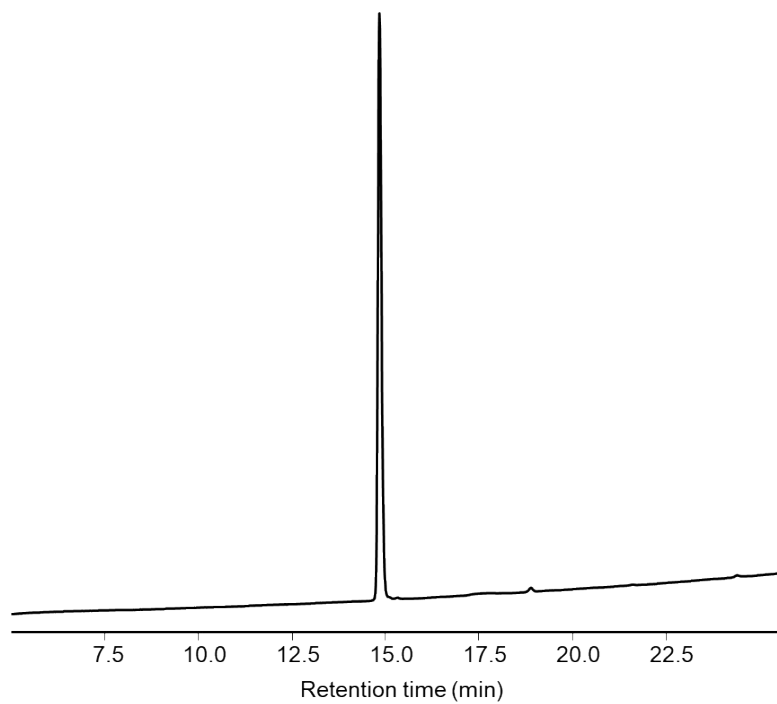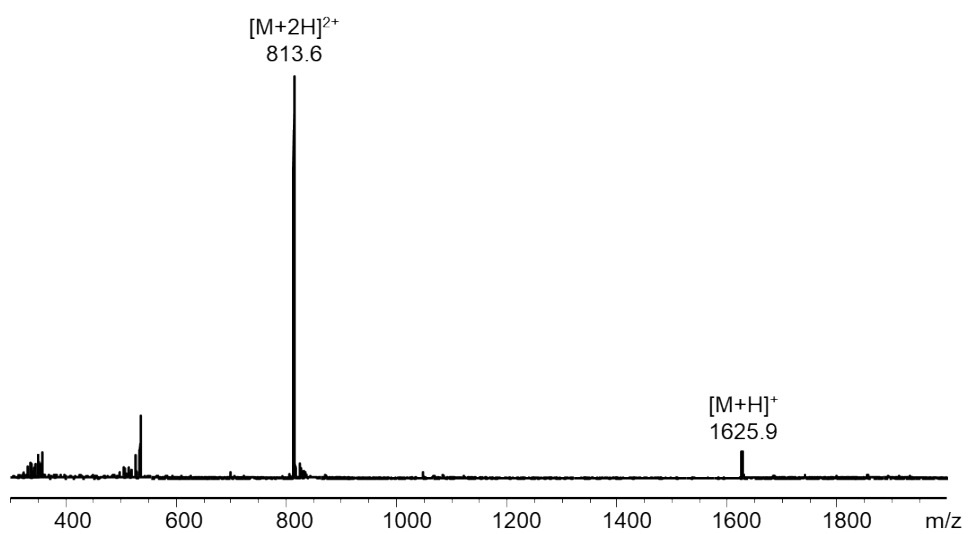

*Ac-VVC(Trt-R<sub>3</sub>)VV-NH<sub>2</sub>*

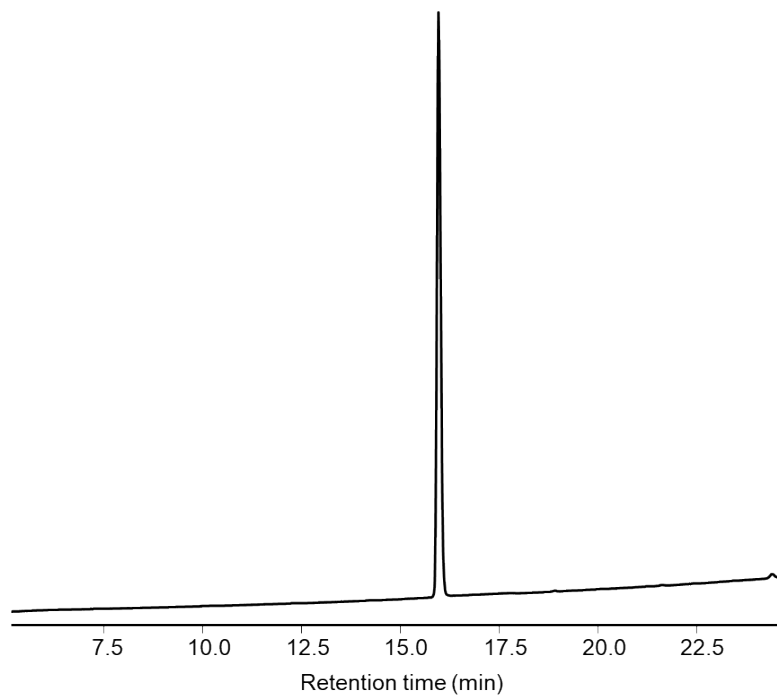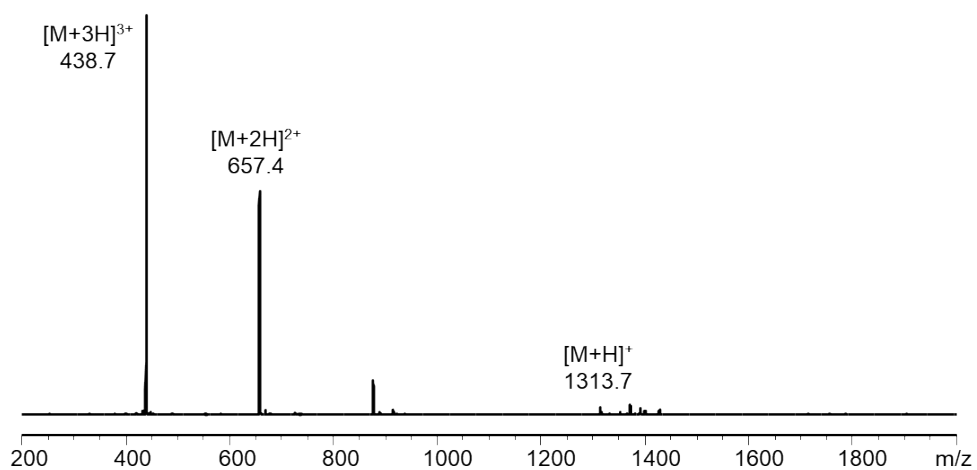

*Ac-VVC(Trt-E<sub>3</sub>)VV-NH<sub>2</sub>*

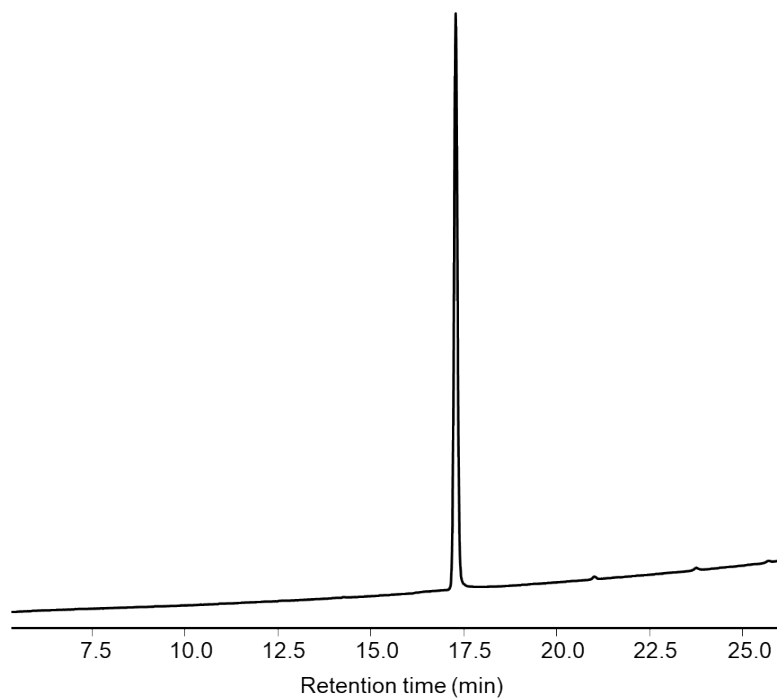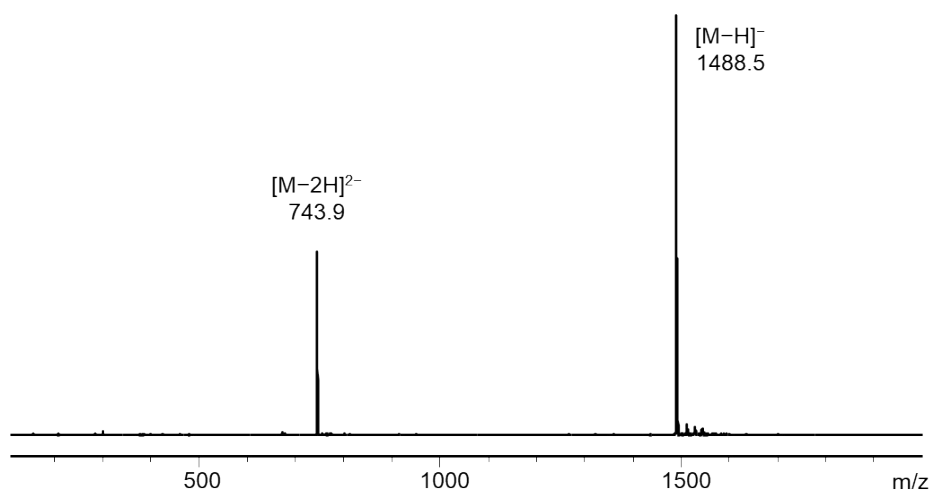

*Ac-VVC(Trt-N<sub>5</sub>)VV-NH<sub>2</sub>*

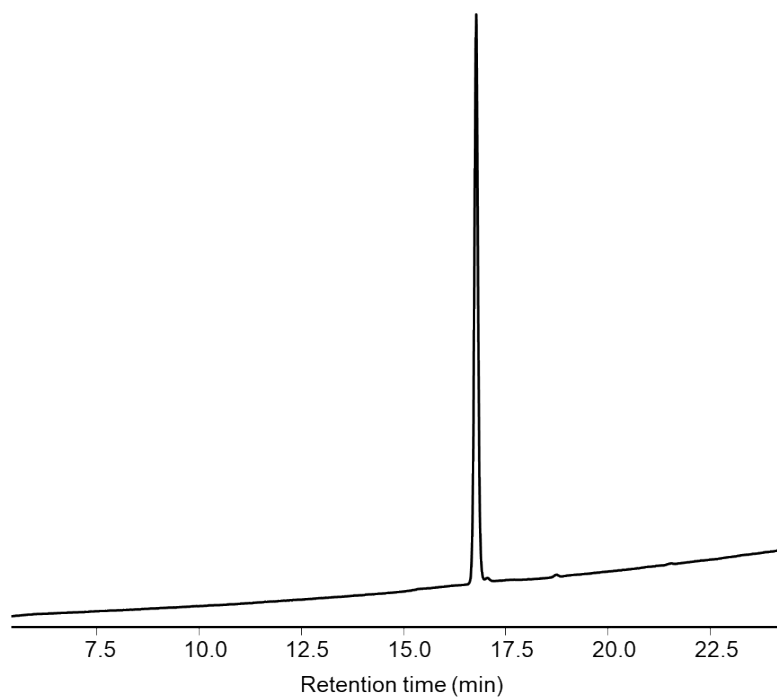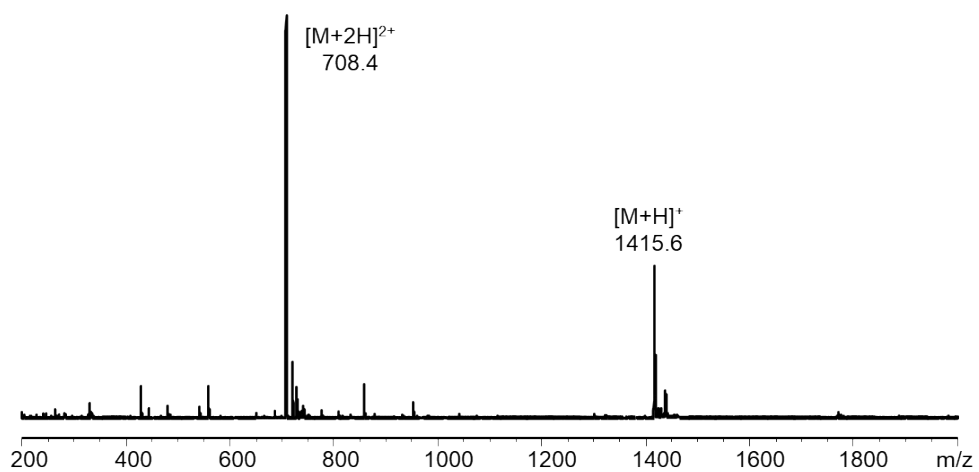



*Ac-VVC{Trt-[K(Me<sub>3</sub>)]<sub>5</sub>}VV-NH<sub>2</sub>*

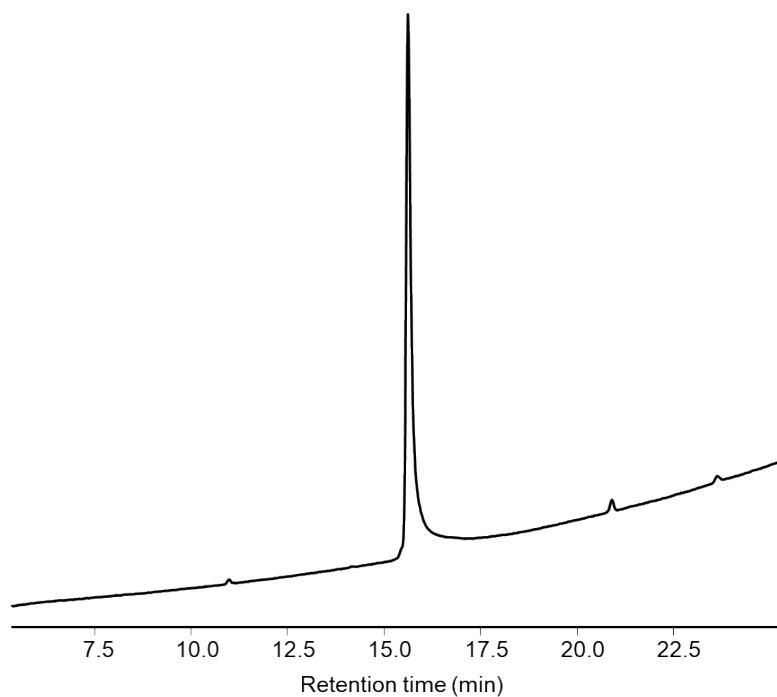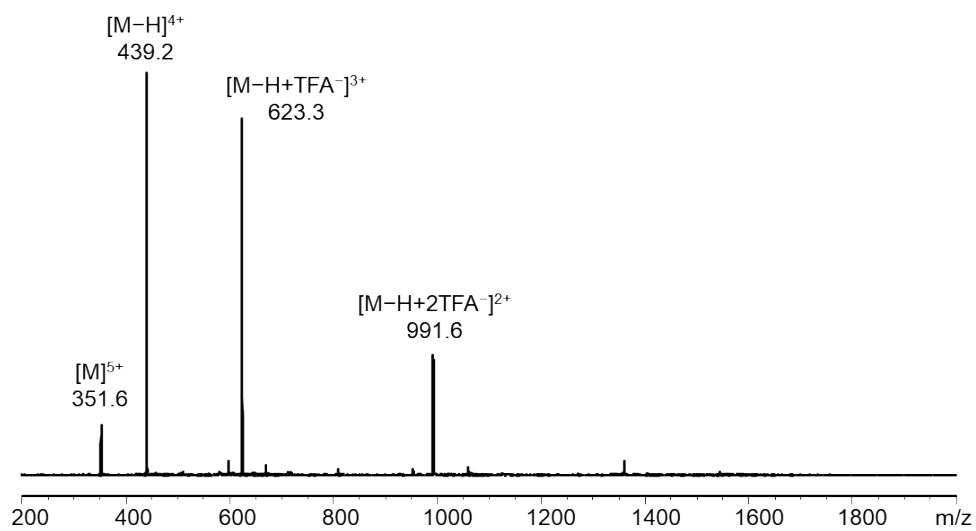

*Ac-VVC{Trt-[C(O<sub>3</sub>H)]<sub>5</sub>G}VV-NH<sub>2</sub>*

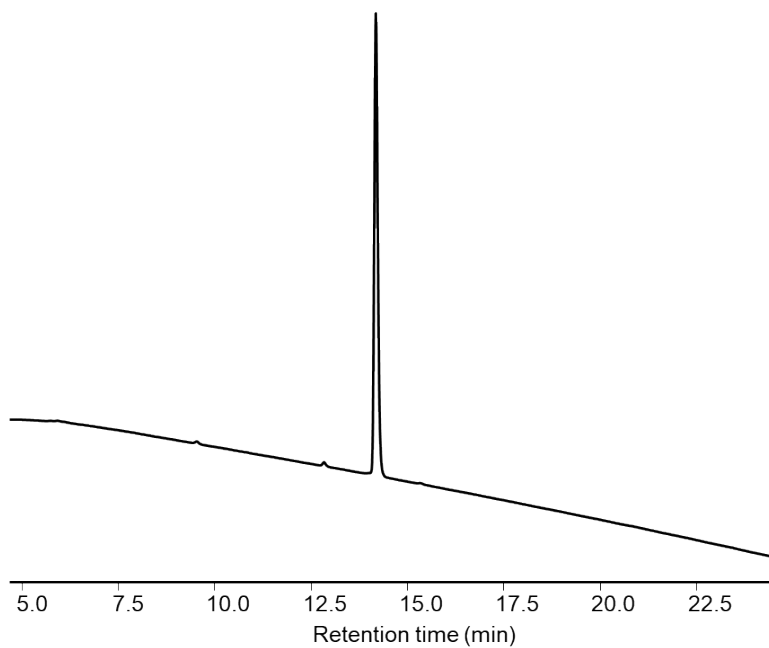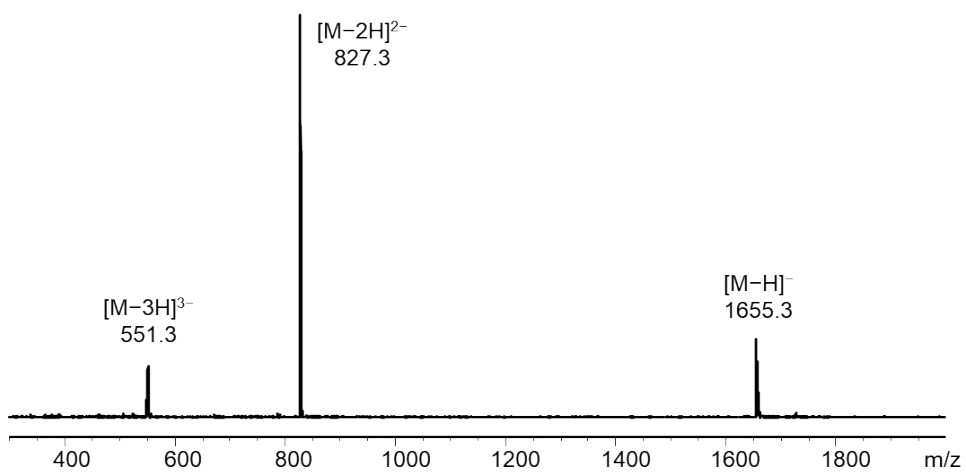

*STGC(Trt-K<sub>10</sub>)ILLGGLFIYDVFWVFGTNNMVTVAKS-NH<sub>2</sub> = SPP4-Trt-K<sub>10</sub>*

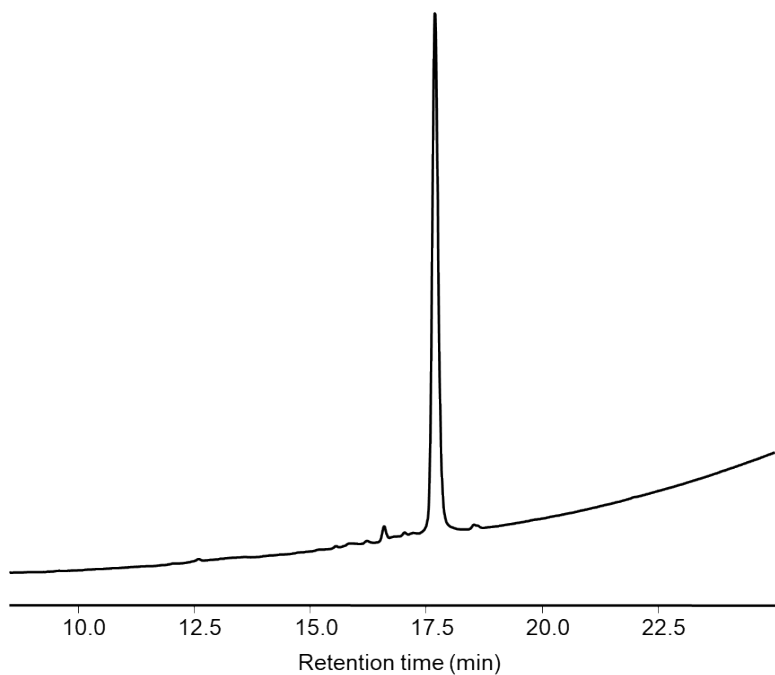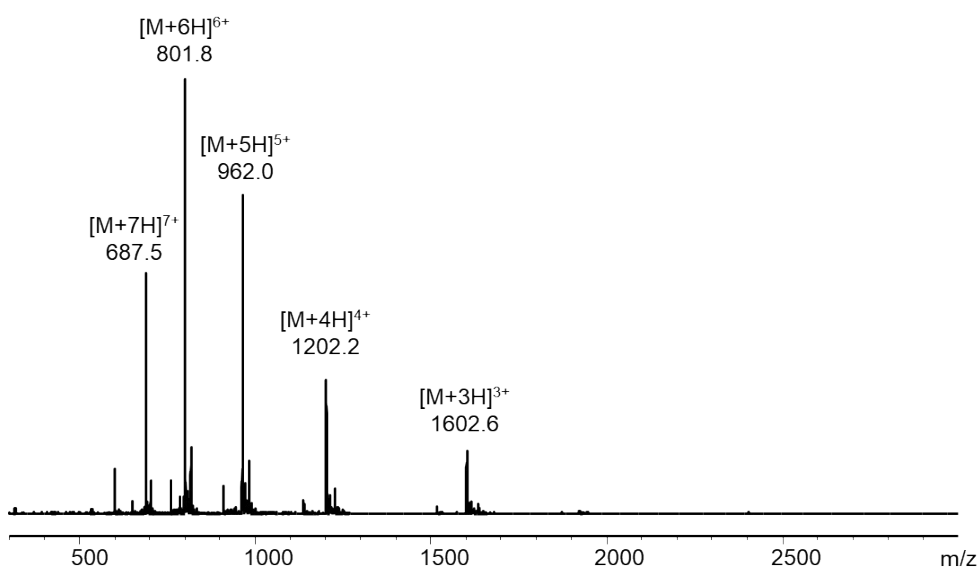

*STGC(Trt-K<sub>8</sub>)ILLGGLFIYDVFVWFGTNNMVTVAKS-NH<sub>2</sub> = SPP4-Trt-K<sub>8</sub>*

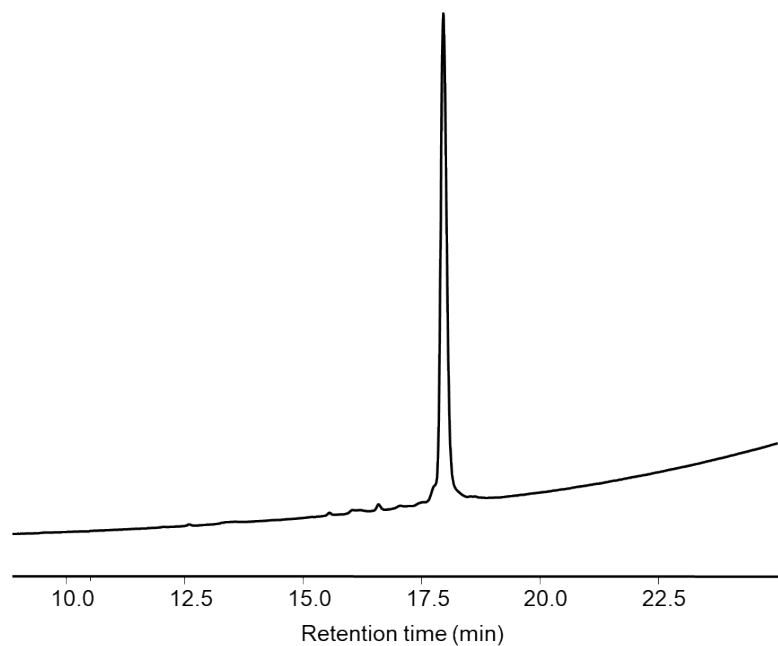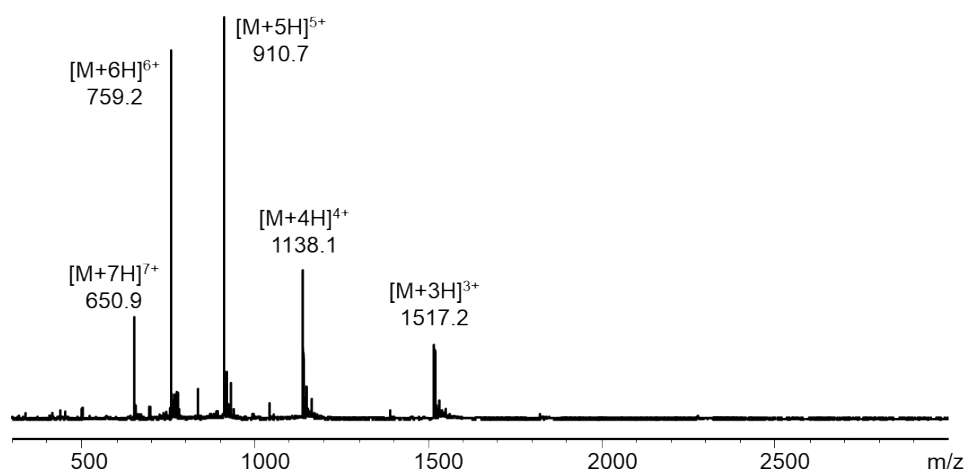

*STGC*(Trt-branched  $K_8$ )*ILLGGLFIYDVFVWVFGTNNMVTVAKS-NH<sub>2</sub>* = *SPP4-Trt-branched K<sub>8</sub>*

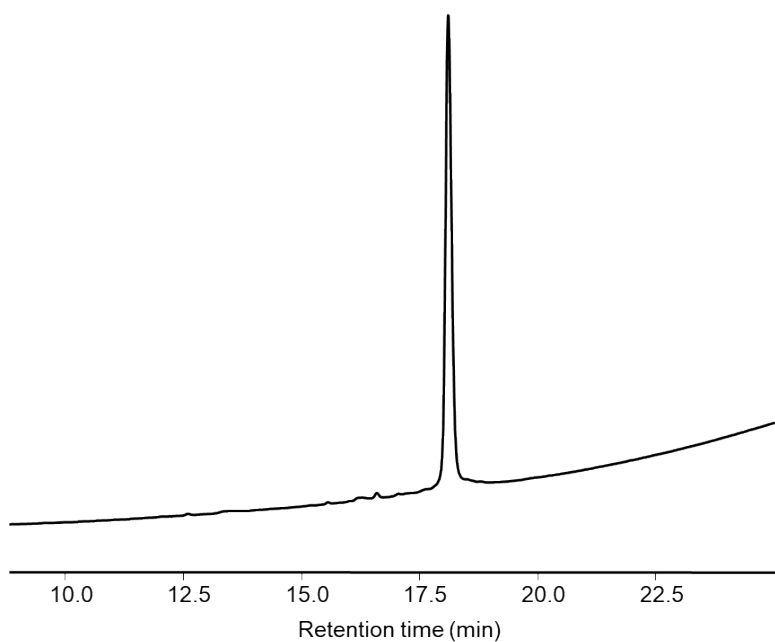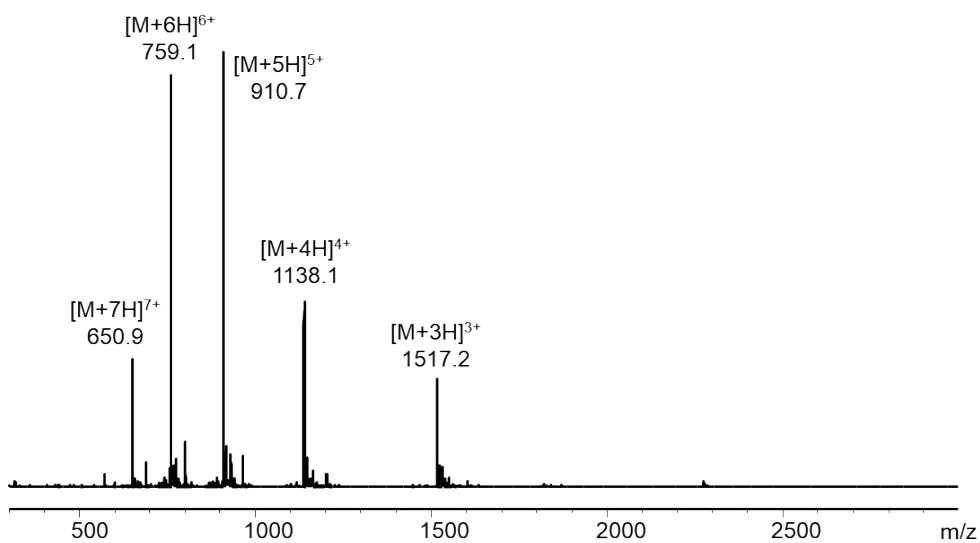

*STGC(Trt-K<sub>5</sub>)ILLGGLFIYDVFVWVFGTNNMVTVAKS-NH<sub>2</sub> = SPP4-Trt-K<sub>5</sub>*

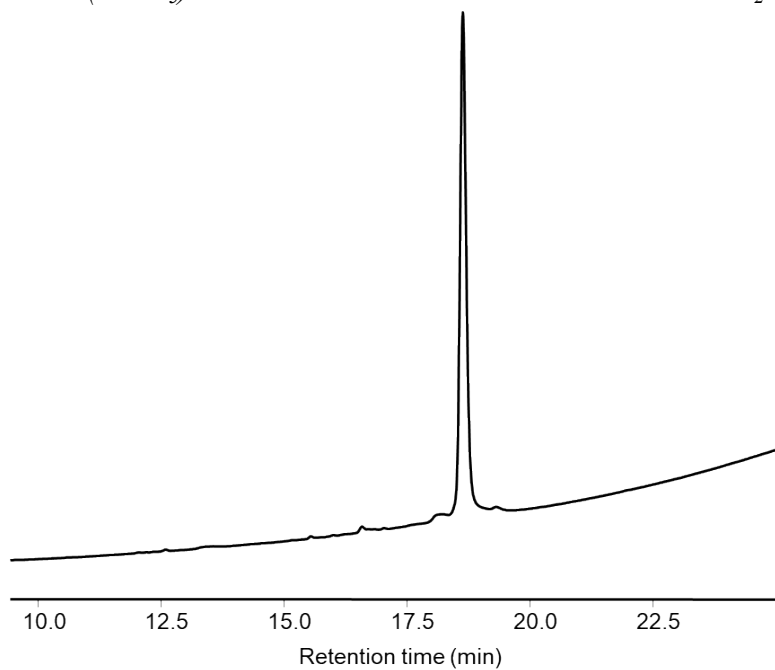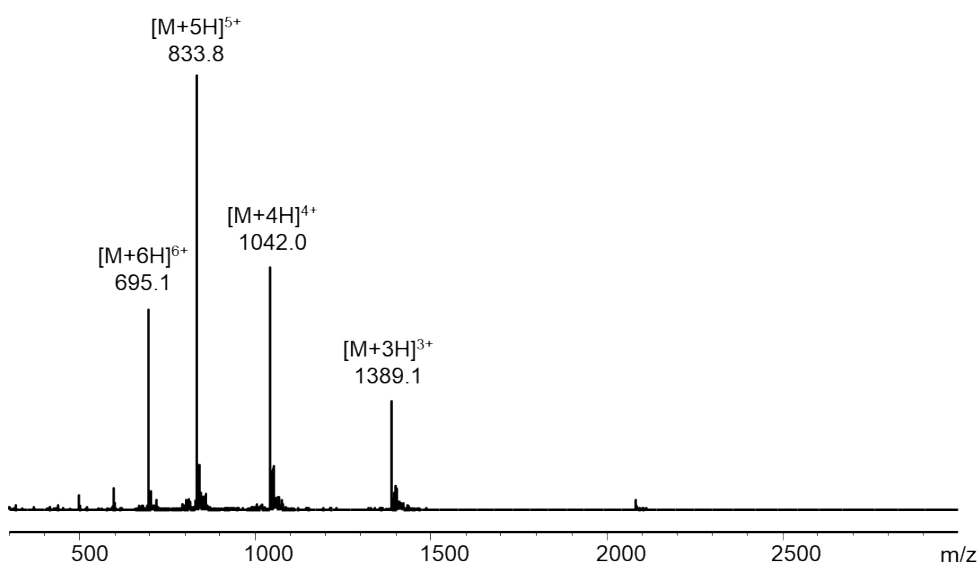

*STGC(Trt-K<sub>4</sub>)ILLGGLFIYDVFVWFVGTNVMVTVAKS-NH<sub>2</sub> = SPP4-Trt-K<sub>4</sub>*

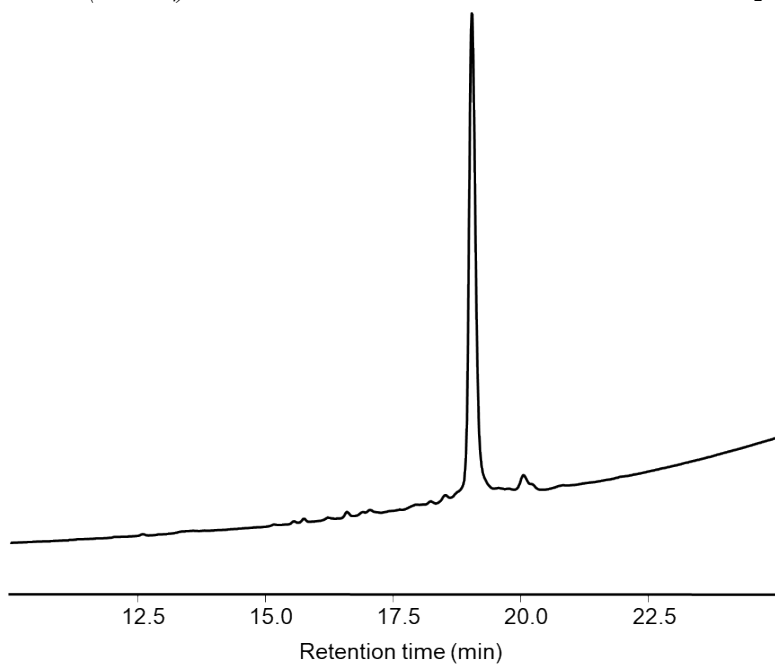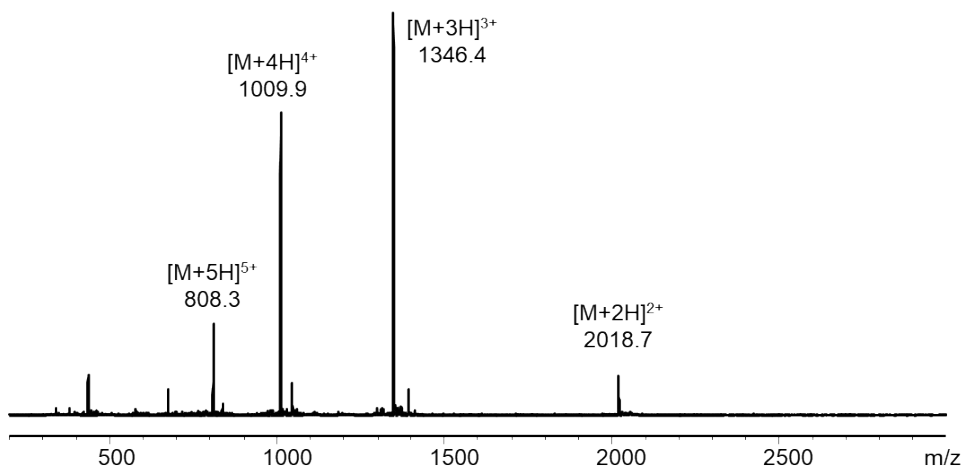

*STGC(Trt-K<sub>3</sub>)ILLGGLFIYDVFVWVFGTNNMVTVAKS-NH<sub>2</sub> = SPP4-Trt-K<sub>3</sub>*

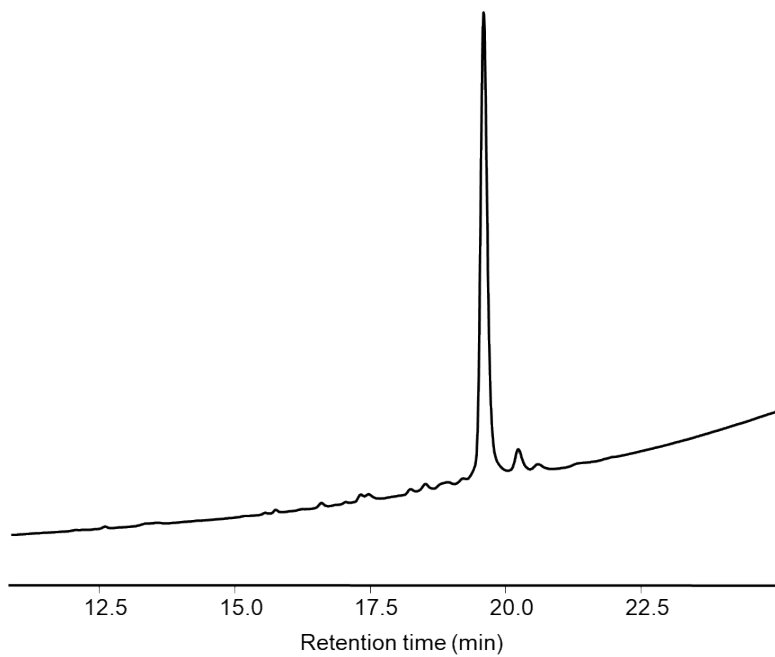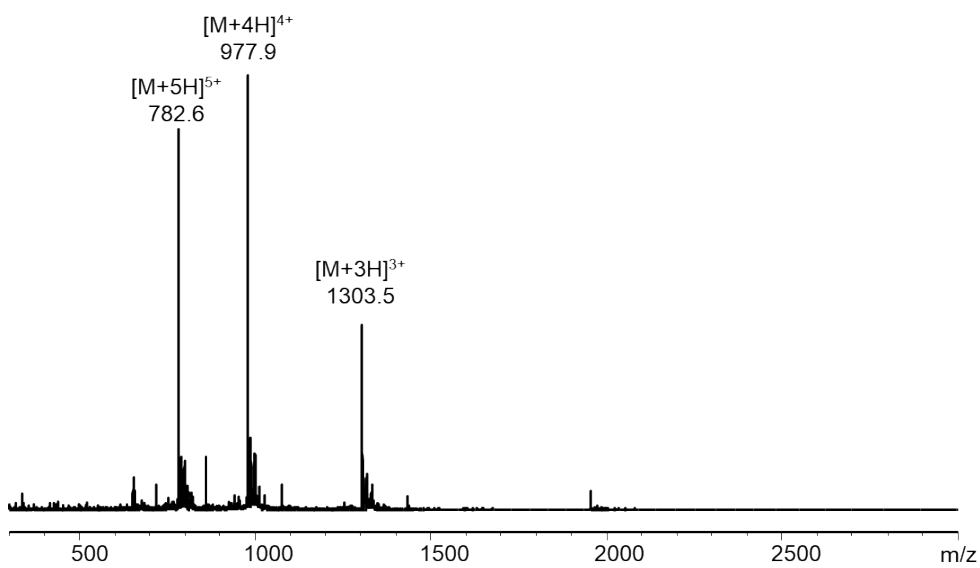



*STGC(Trt-R<sub>8</sub>)ILLGGLFIYDVFVWFVGTNVMVTVAKS-NH<sub>2</sub> = SPP4-Trt-R<sub>8</sub>*

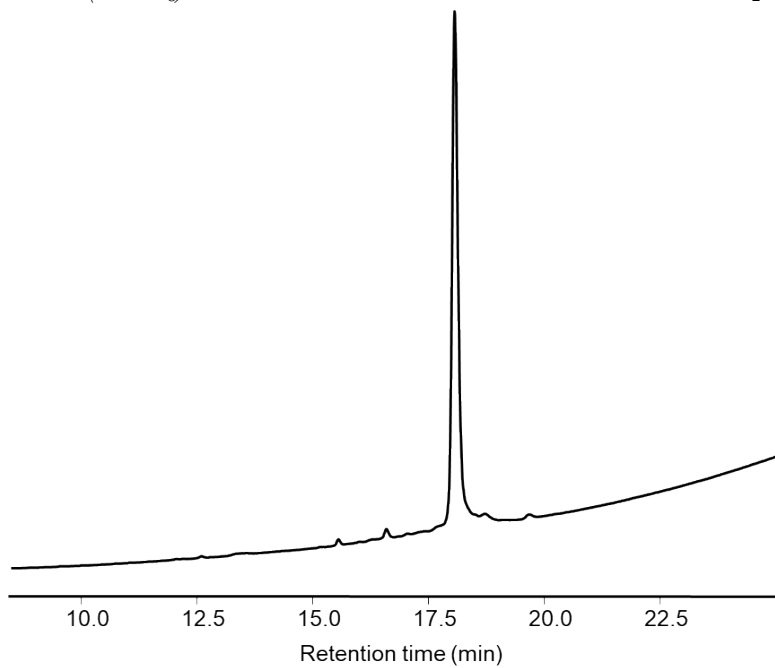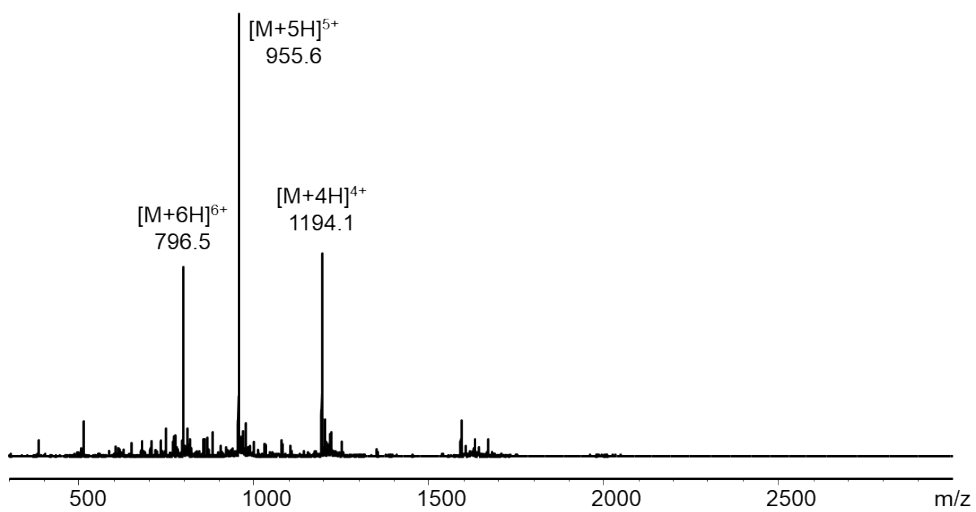

*STGC(Trt-R<sub>5</sub>)ILLGGLFIYDVFVWVFGTNNMVTVAKS-NH<sub>2</sub> = SPP4-Trt-R<sub>5</sub>*

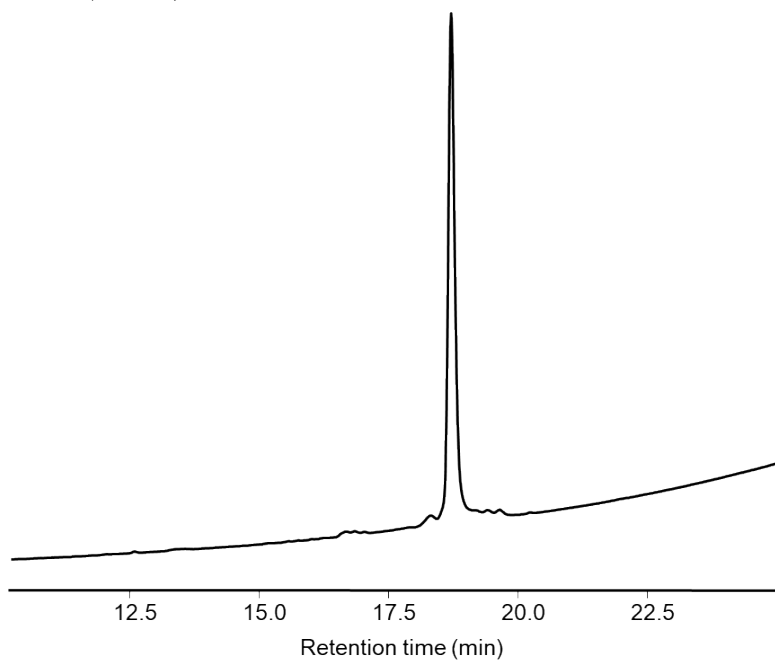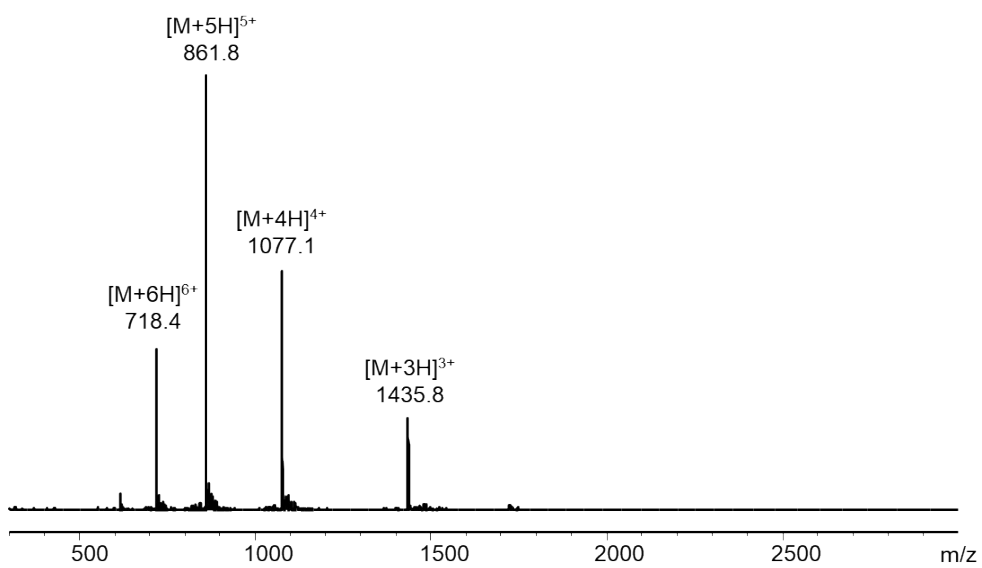

*STGC(Trt-R<sub>3</sub>)ILLGGLFIYDVFVWFVGTNVMVTVAKS-NH<sub>2</sub> = SPP4-Trt-R<sub>3</sub>*

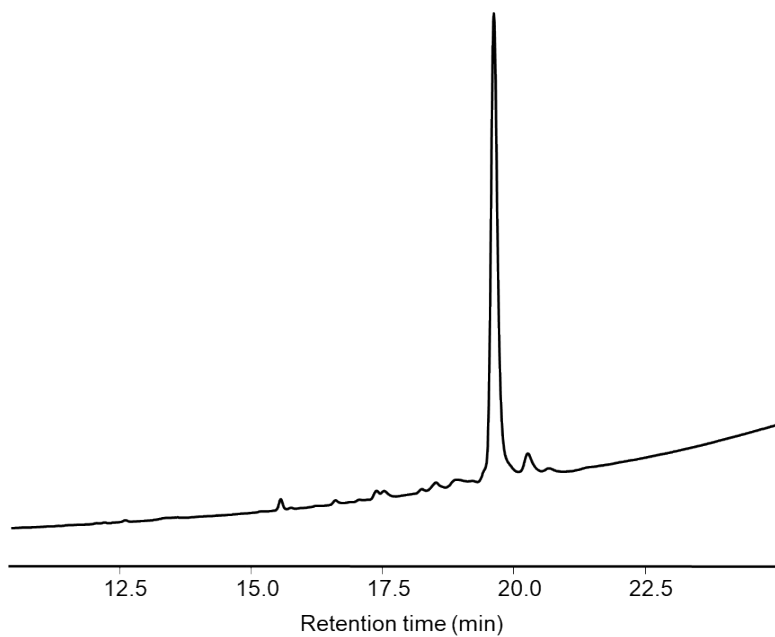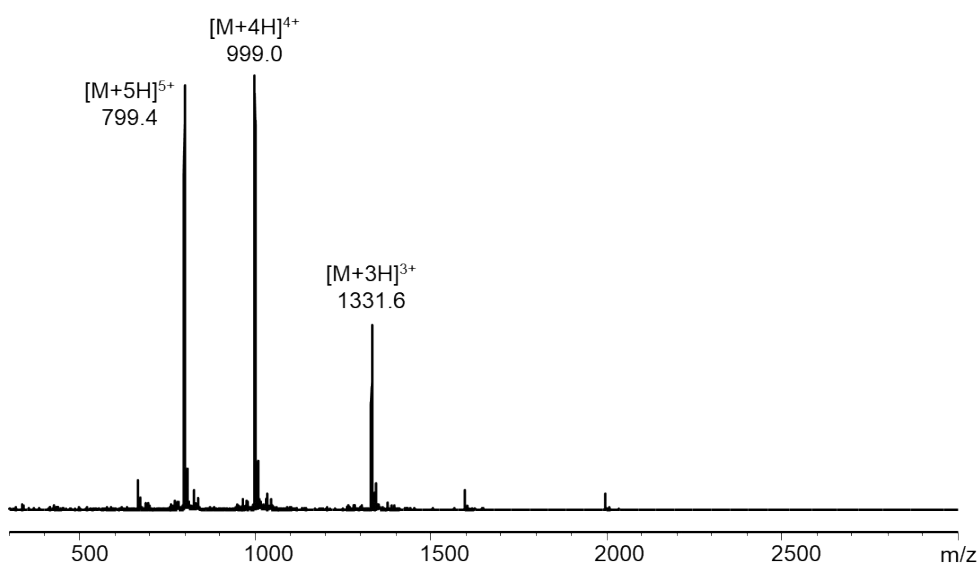

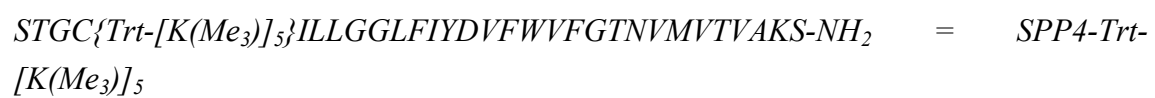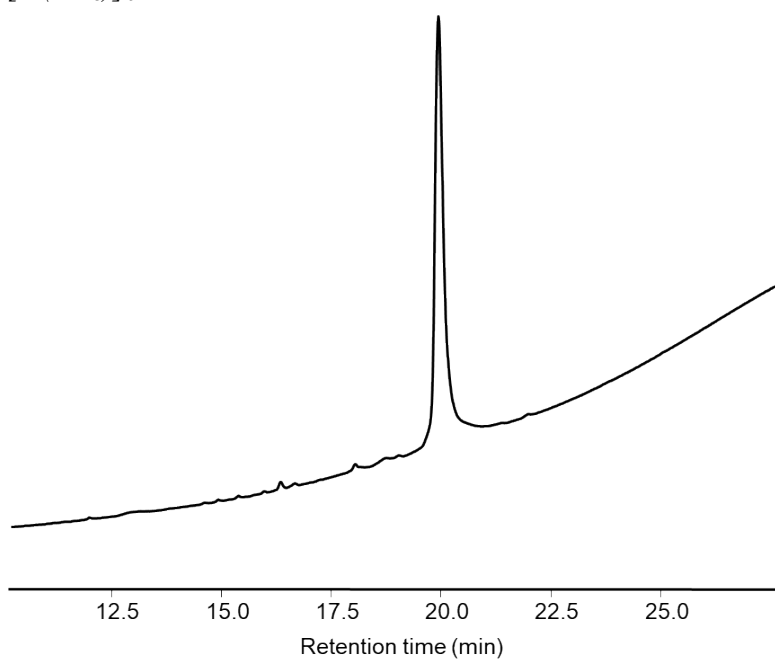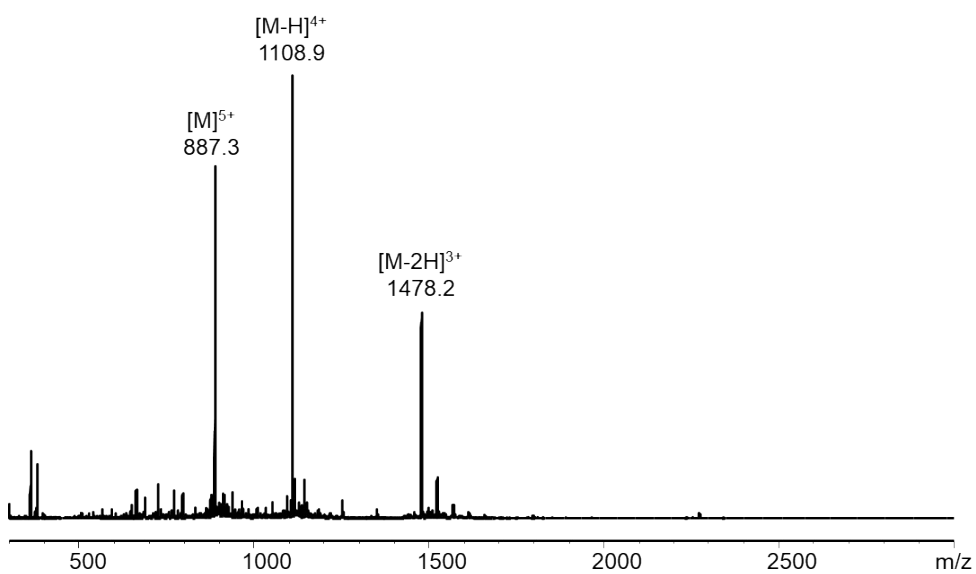

Supplement: c9ob02253h1.pdf [file c9ob02253h1.pdf]
